# Supplementary material for: The multicellularity genes of dictyostelid social amoebas
Source: PubMed Central journal article supplement (PMC4931340; doi:10.1038/ncomms12085), 2016-06-30

## Supplementary Data File 2. Phylogenies of developmentally essential genes annotated with domain architectures and developmental expression profiles

Phylogenies of 385 *DD* DEG with their closest homologs in the Dictyostelids *DP*, *DL*, *PP* and *DF*, the unicellular amoebozoia *PhyP*, *AC* and *EH* and outside of Amoebozoa were prepared by Bayesian inference as outlined in Methods. Bayesian posterior probabilities of tree nodes are indicated by coloured dots. The trees are annotated with the protein domain architectures of the genes as determined by SMART<sup>1</sup>, using simplified diagrams to allow size-reduction. PFAM<sup>2</sup> or SCOP<sup>3</sup> domains are represented by rectangles, filled with colour gradients starting from black or tan on the left side, respectively.

Developmental transcriptional profiles were retrieved for *DD* (DDBa, DDBb) and *DP* (DPUa, DPUb) from a replicate time course<sup>4</sup> and for *DF* and *PP* from two separate experiments, which were analysed using either the Roche 454 (DFAa, PPLa) or Illumina platforms (DFAb, PPLb). For *DL* a single experiment, analysed using the Illumina platform (DLA) was used. Due to differences in the duration of development between species, the profiles were stage-matched rather than time matched. These stage are vegetative (t0 for *DD*, *DP*), early aggregate (t4), completed aggregate (t8), tipped mound (t12), slug (t16), early culmination (t20), mature fruiting body (t24). The *DD* and *DP* experiments also contain transcript reads for purified prestalk (pst) and prespore cells (psp), while the *PP* 454 series contains reads from purified spore- and stalk cells.

For time series, normalized reads were expressed as percentage of the highest read count of the series and presented as yellow to red heatmaps. For (pre)stalk and (pre)spore isolates reads are expressed as percentage of the summed reads of both isolates, and presented as white to green heatmaps. Names of species or kingdoms (for non-Amoebozoa) are colour-coded, as indicated at the top of the figure. Genes are alphabetically ordered and can be found at the following page numbers:

| Gene name        | page | Gene name | page |
|------------------|------|-----------|------|
| aa-al            | 1    | grp-ip    | 12   |
| am-bz            | 2    | kc-mhc    | 13   |
| ca-cm            | 3    | mhk-myoB  | 14   |
| cn-co            | 4    | myoG-pad  | 15   |
| cp-cy            | 5    | pak-pkg   | 16   |
| dga-DG1039       | 6    | pl-pte    | 17   |
| DG1040-DG1122    | 7    | ptp-ri    | 18   |
| DG2033-dn        | 8    | ro-snf    | 19   |
| do-fr p9 fu-gefB | 10   | snp-sv    | 20   |
| gefL-grl         | 11   | ta-tsg    | 21   |
|                  |      | tsu-zi    | 22   |

## References

- 1 Schultz, J., Milpetz, F., Bork, P. & Ponting, C. P. SMART, a simple modular architecture research tool: identification of signaling domains. *Proc. Natl. Acad. Sci. USA* **95**, 5857-5864. (1998).
- 2 Bateman, A. *et al.* The Pfam protein families database. *Nucleic Acids Res.* **28**, 263-266. (2000).
- 3 Murzin, A. G., Brenner, S. E., Hubbard, T. & Chothia, C. SCOP: a structural classification of proteins database for the investigation of sequences and structures. *J Mol Biol* **247**, 536-540 (1995).
- 4 Parikh, A. *et al.* Conserved developmental transcriptomes in evolutionarily divergent species. *Genome Biol* **11**, R35, doi:gb-2010-11-3-r35 (2010).

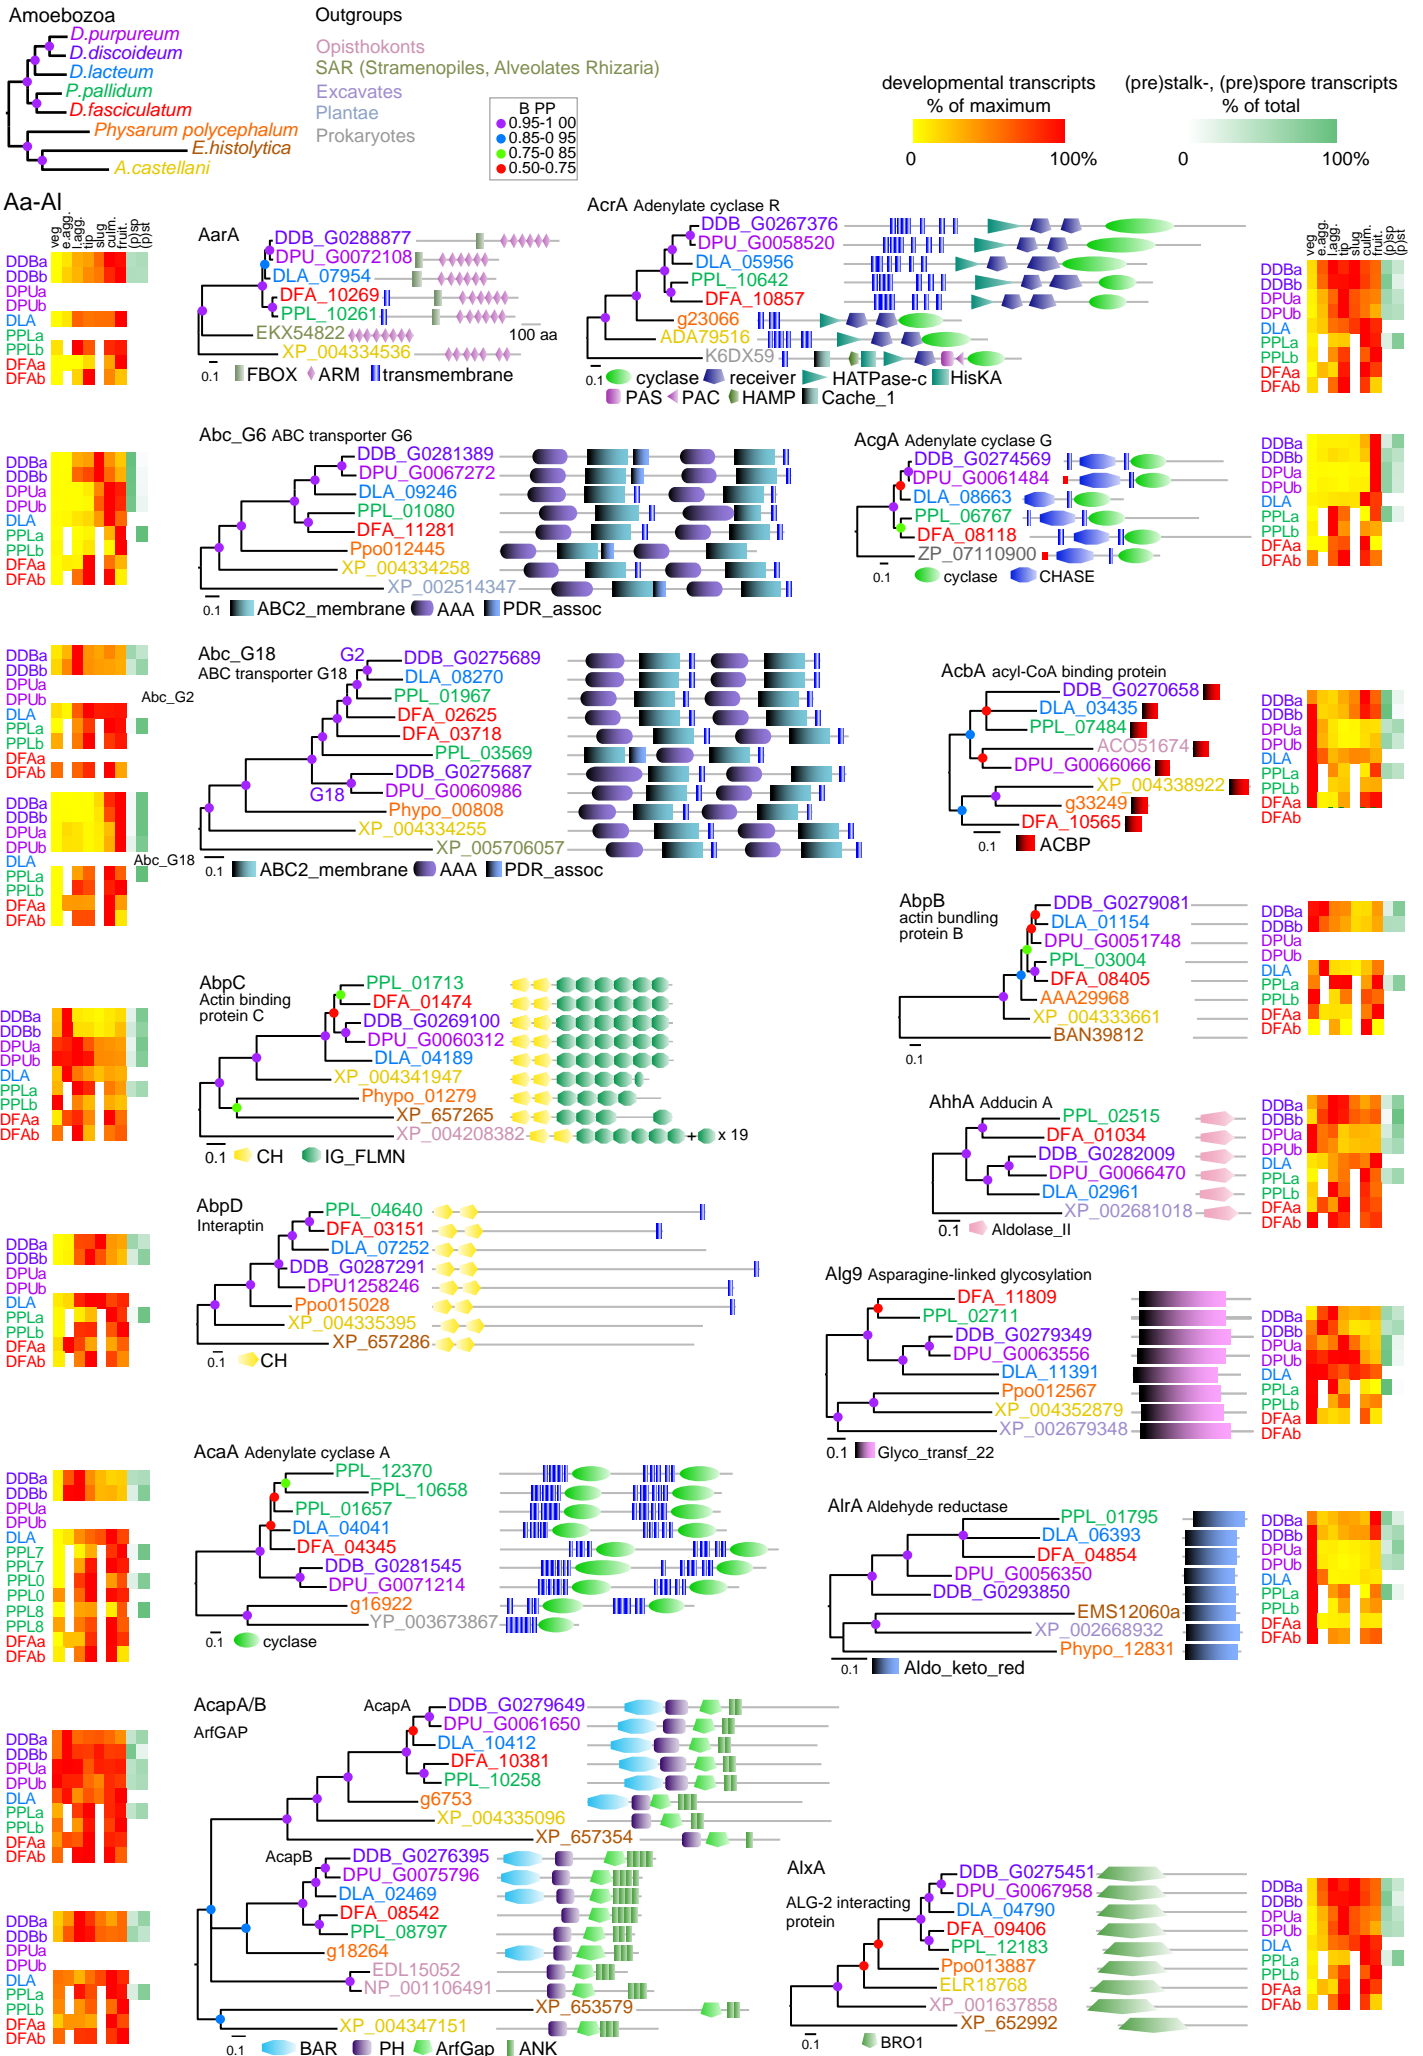

AmdA-B

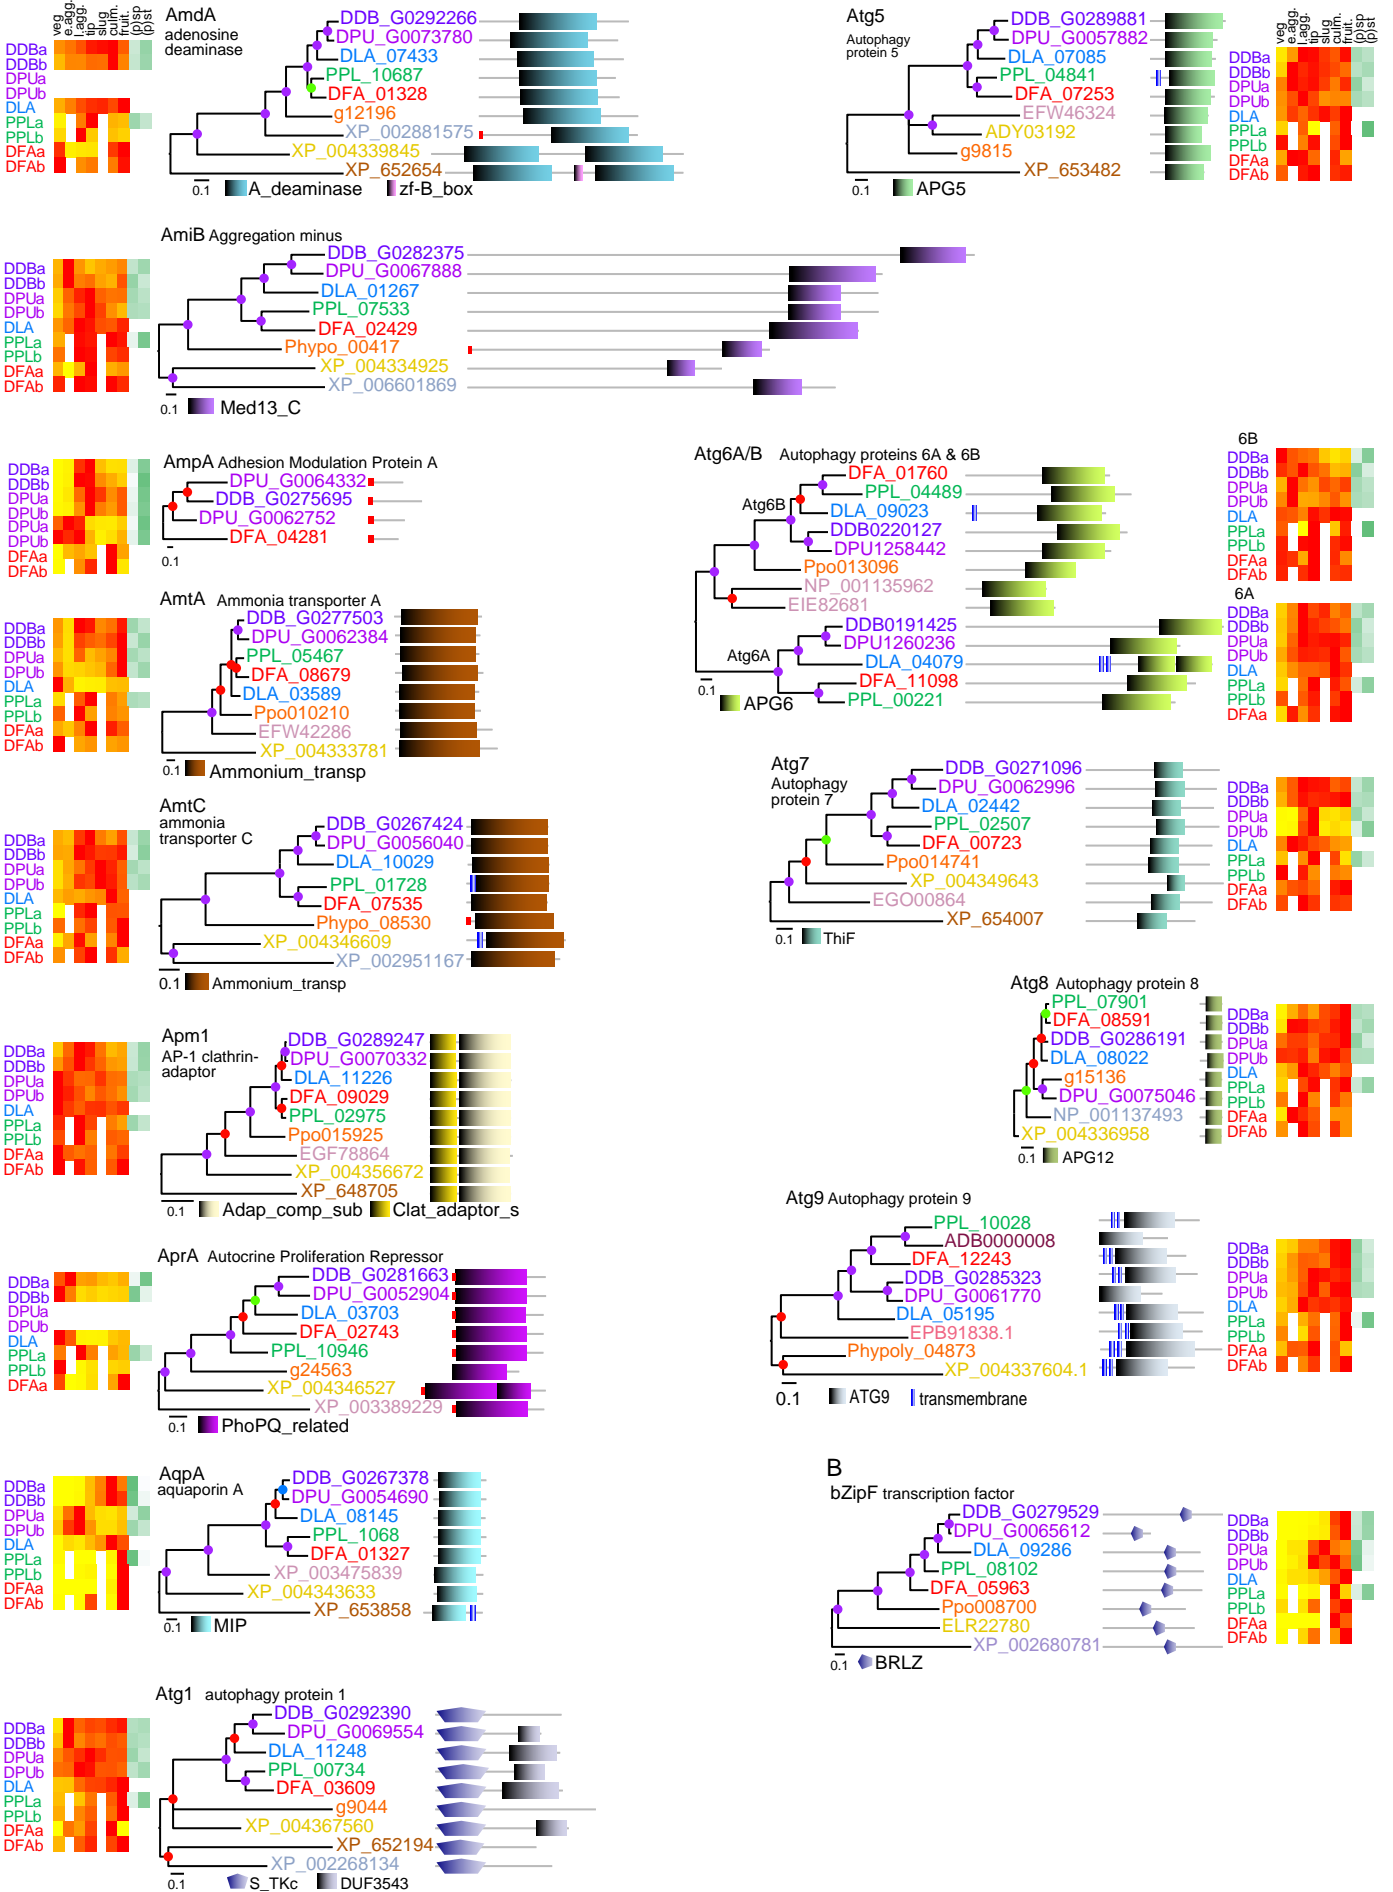

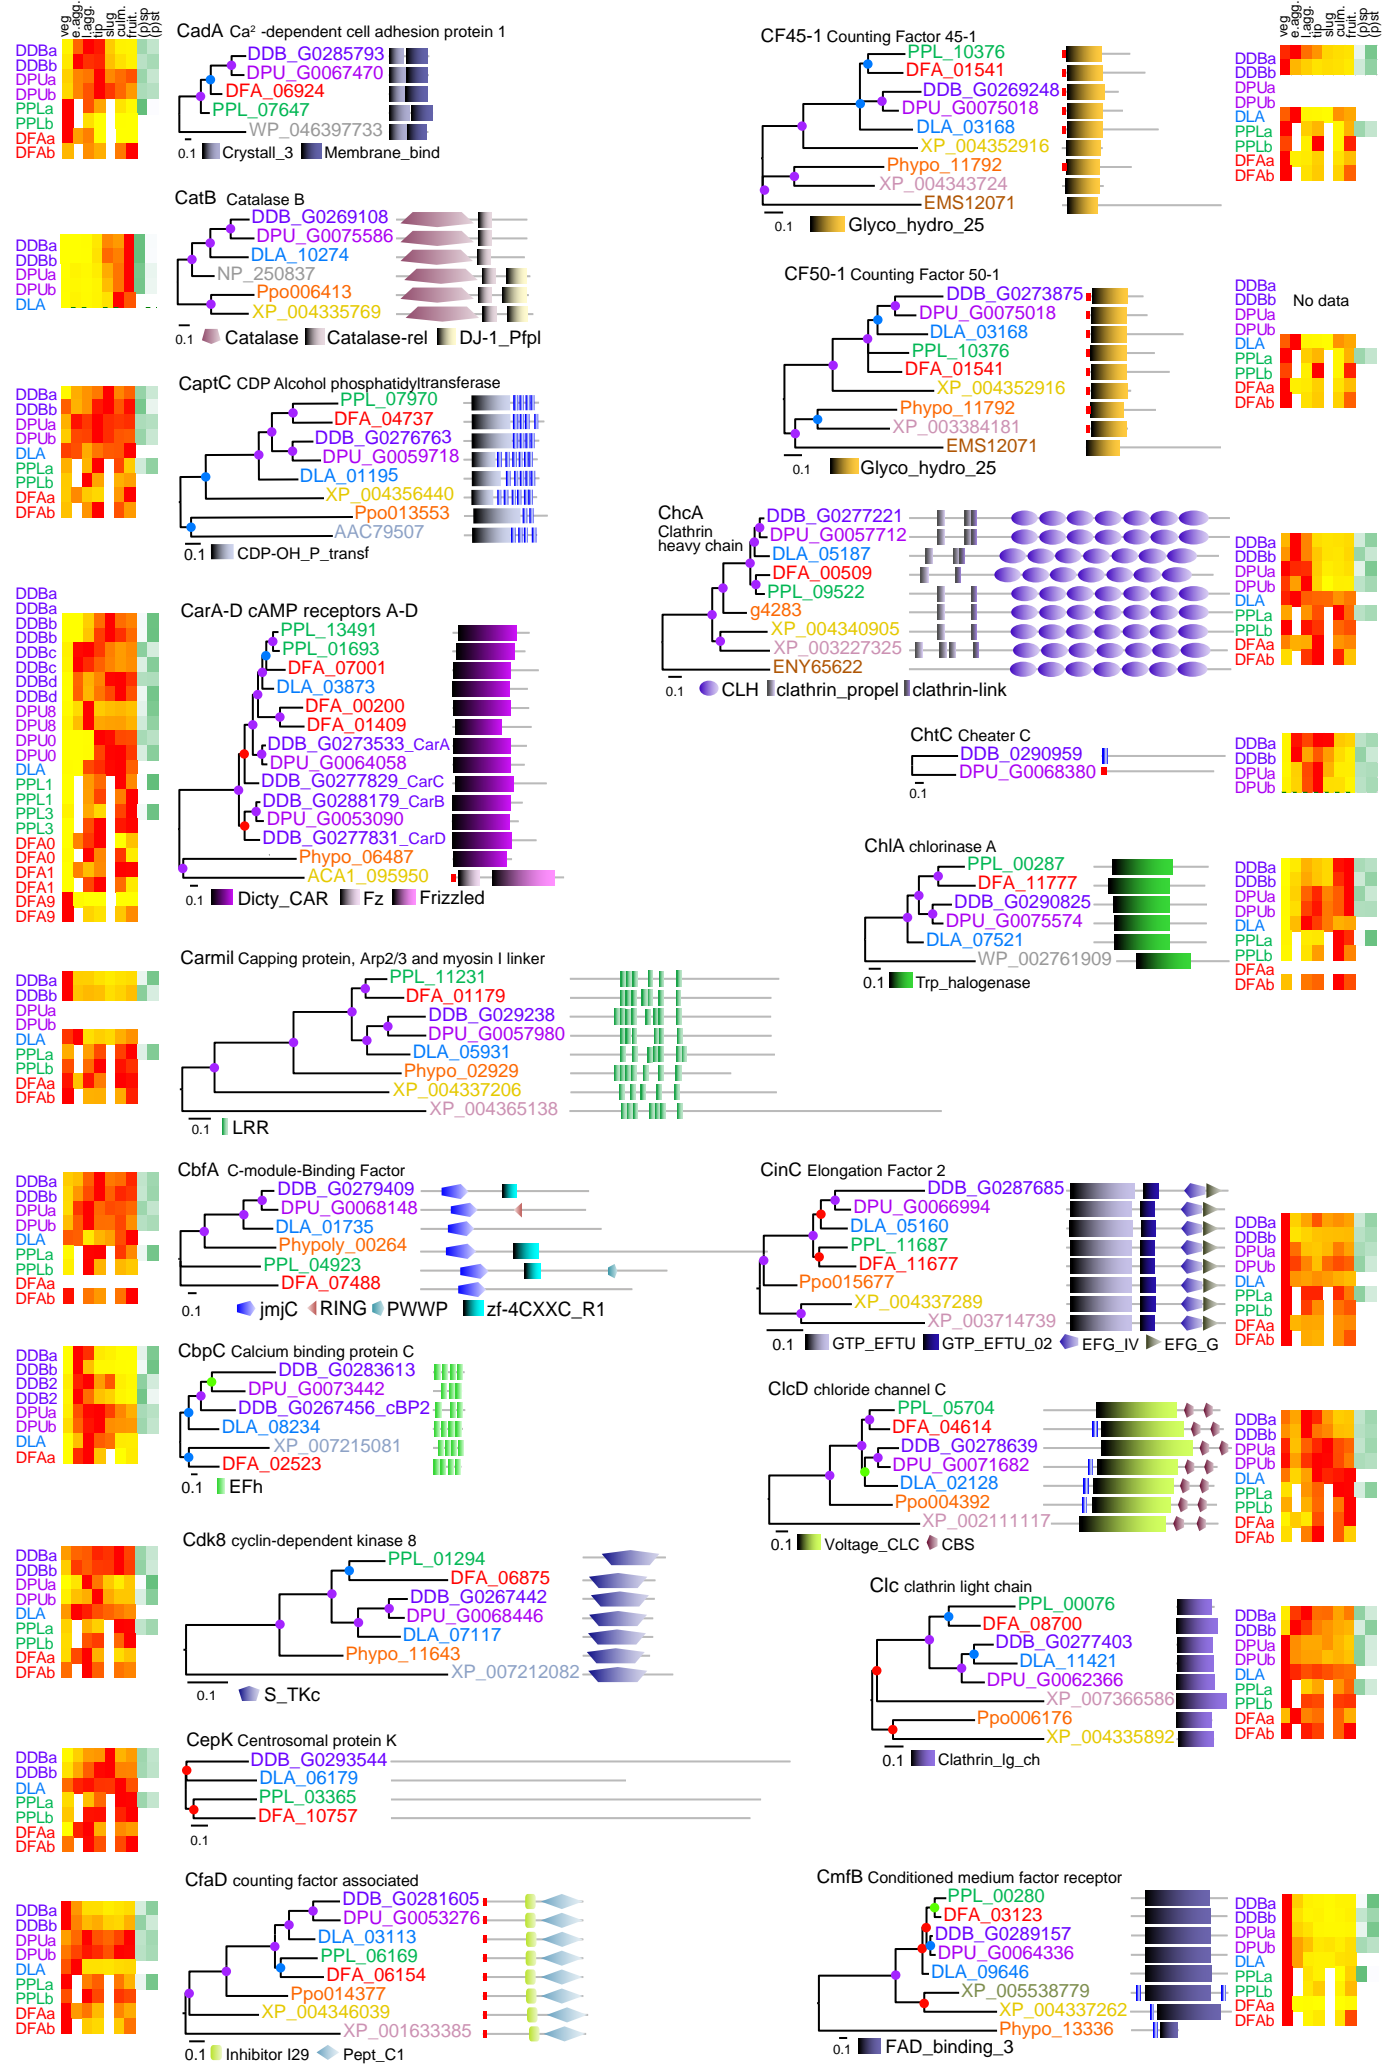

Cn-Co

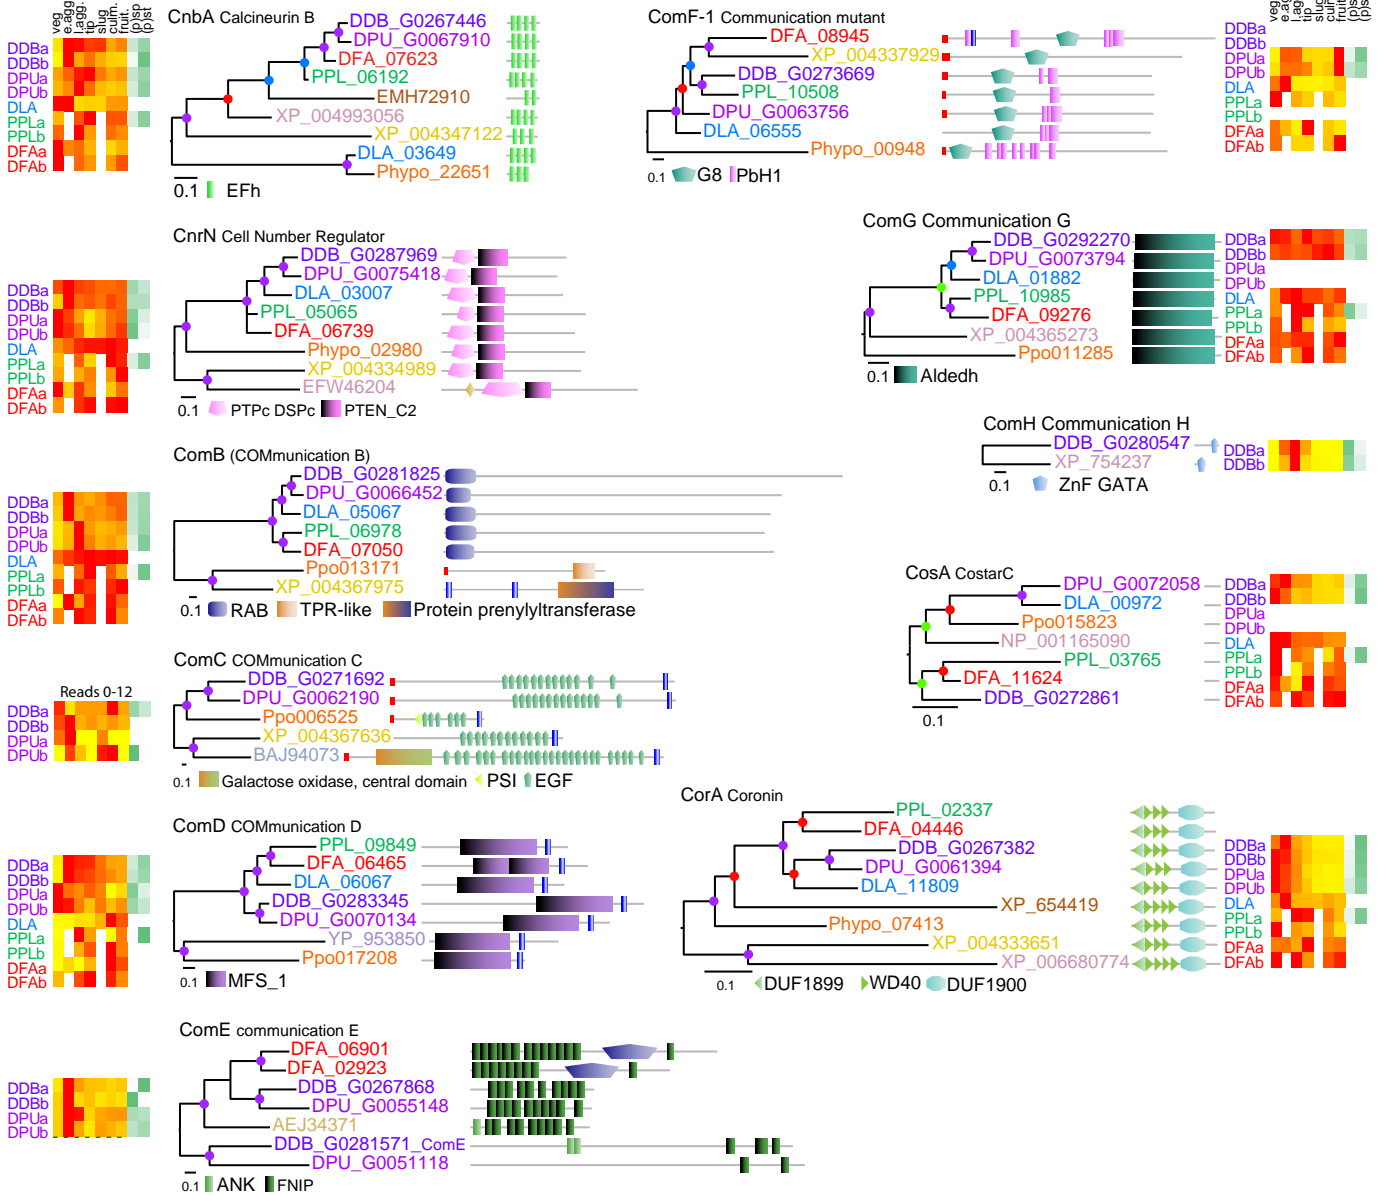

Sporecoat proteins CotA-E, pspB,D and sigD

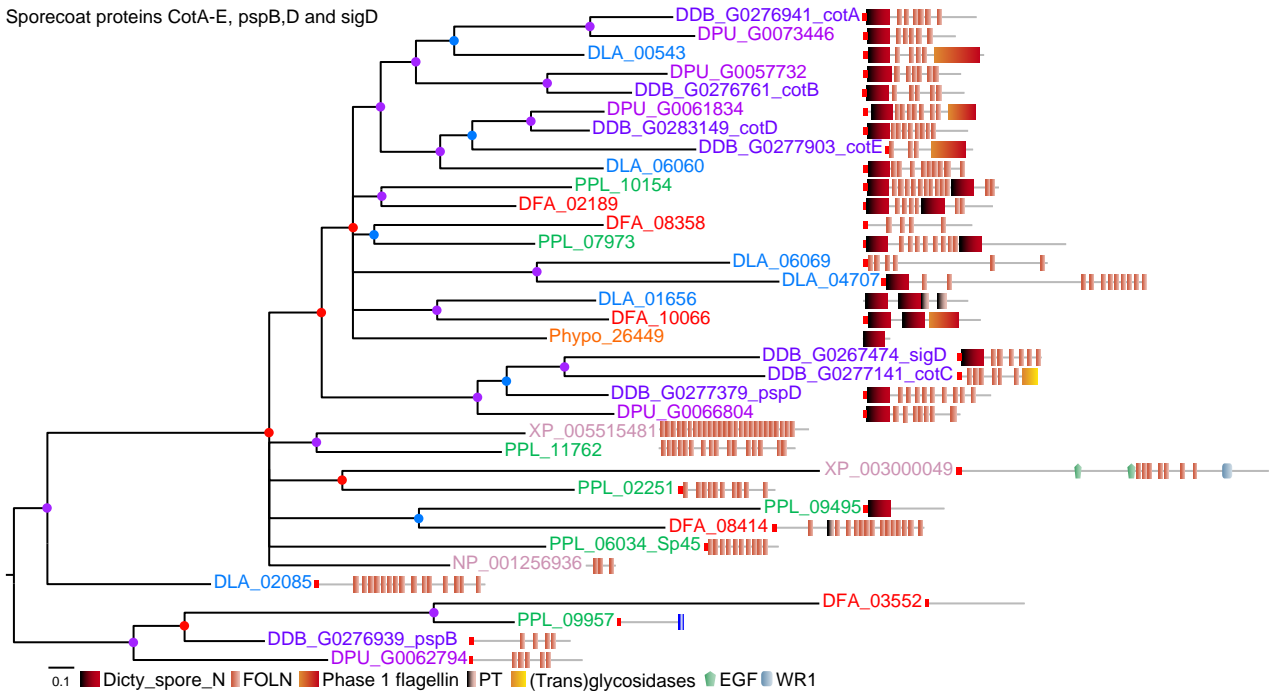

Cp-Cy

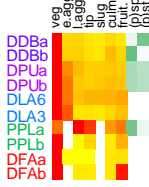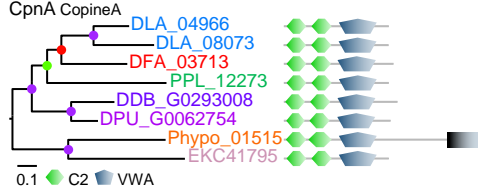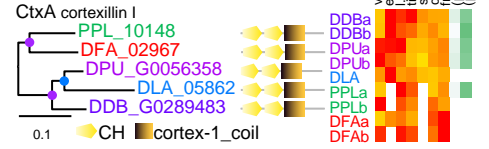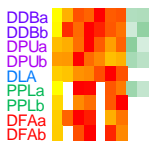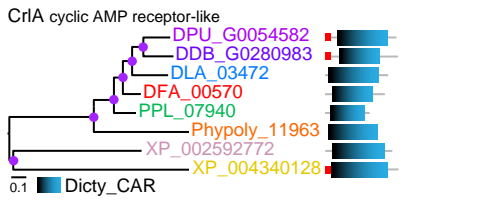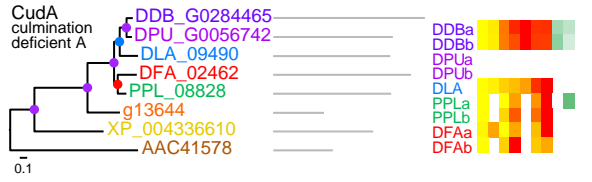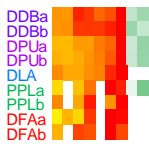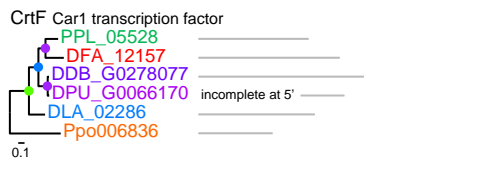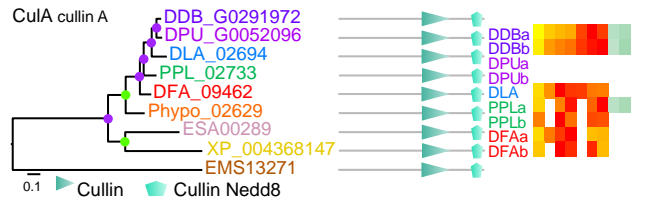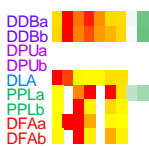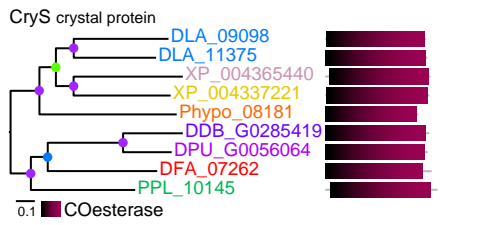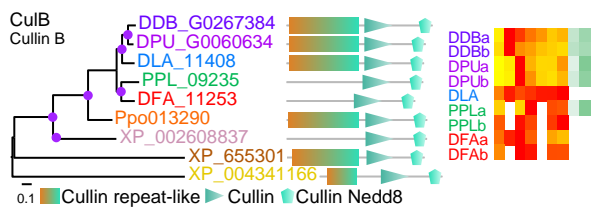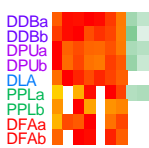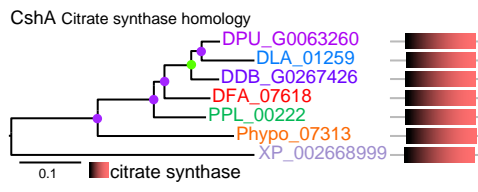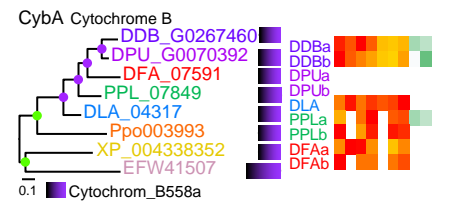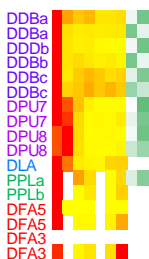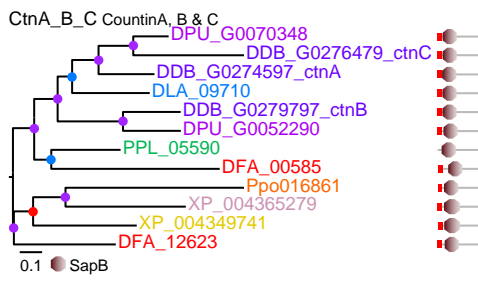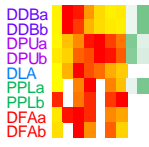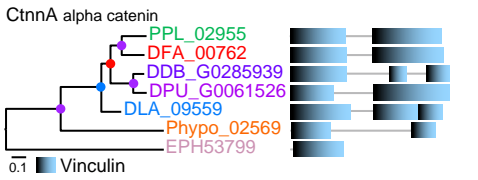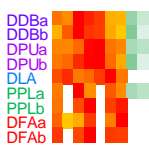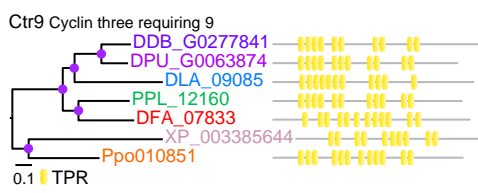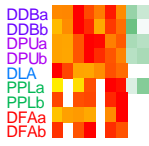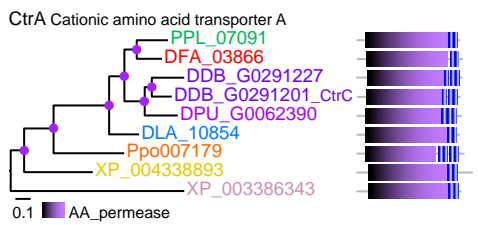

Da-DG1039

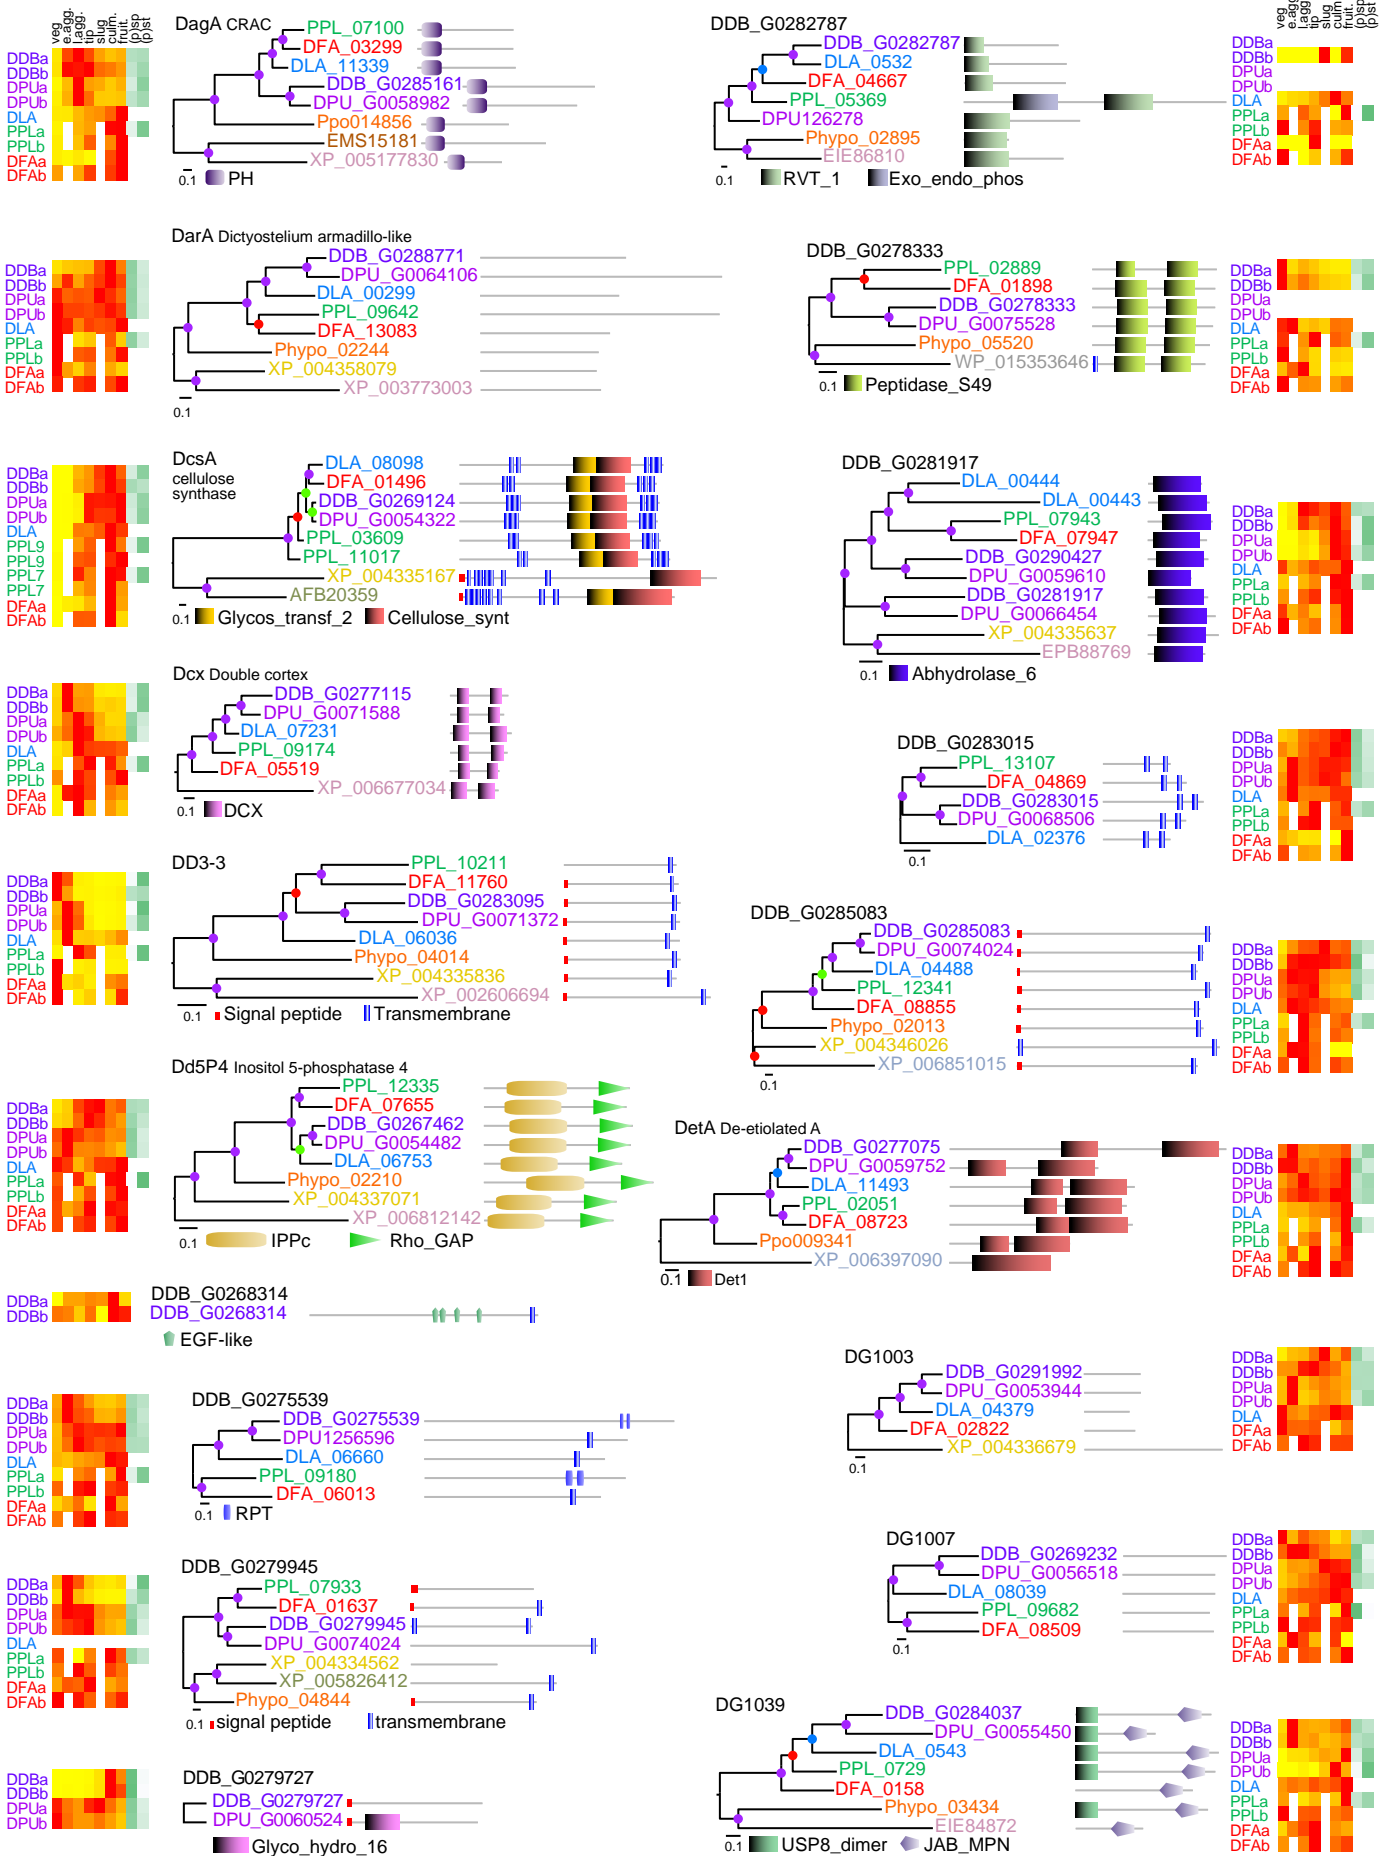

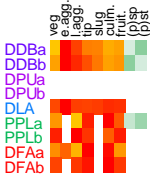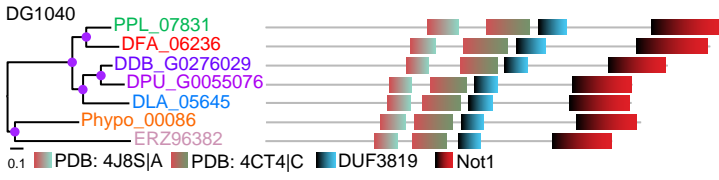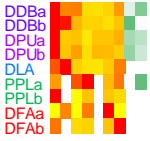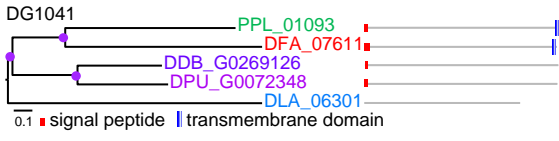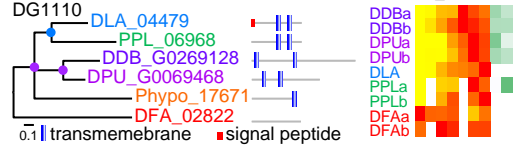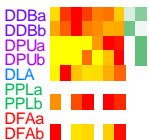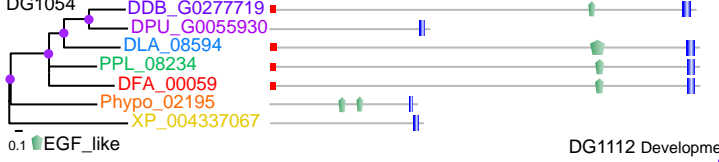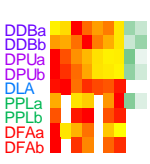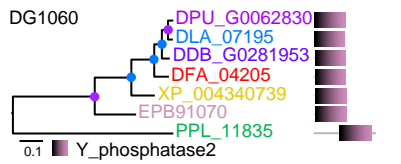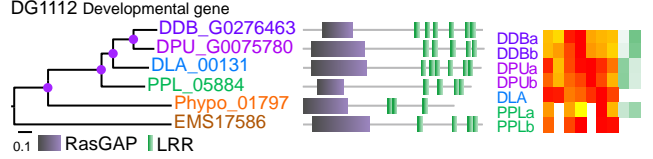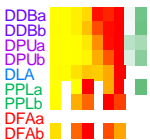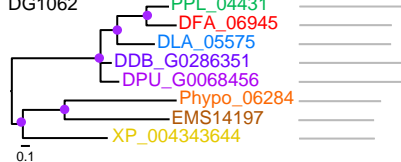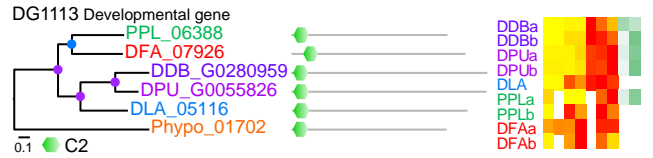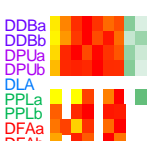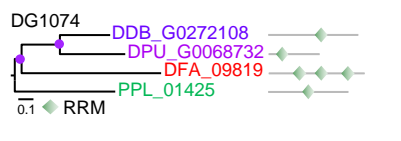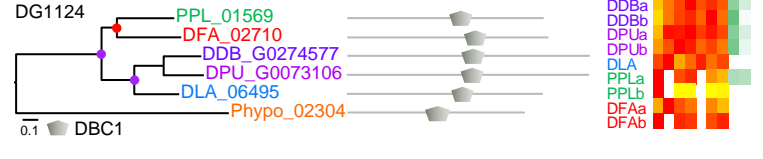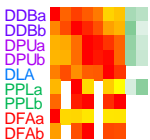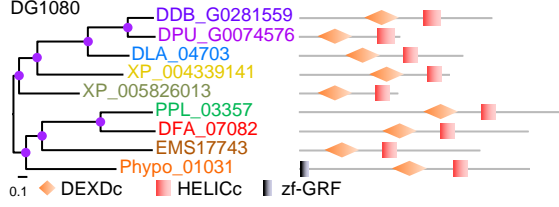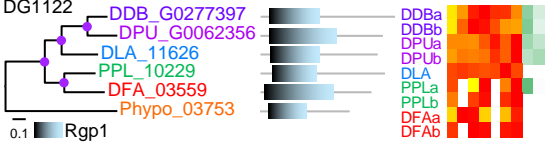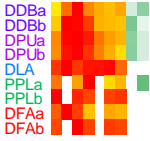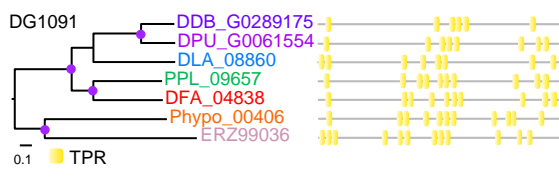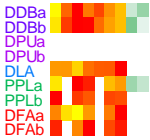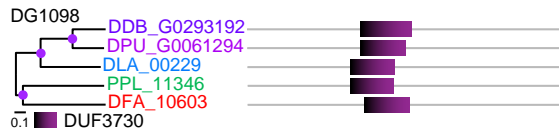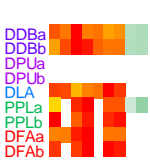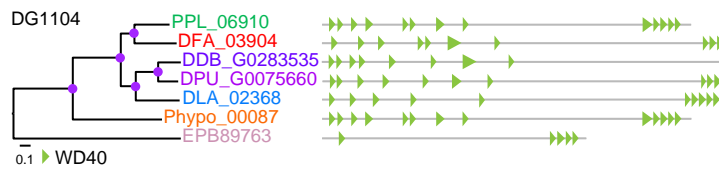



DG2033-Dn

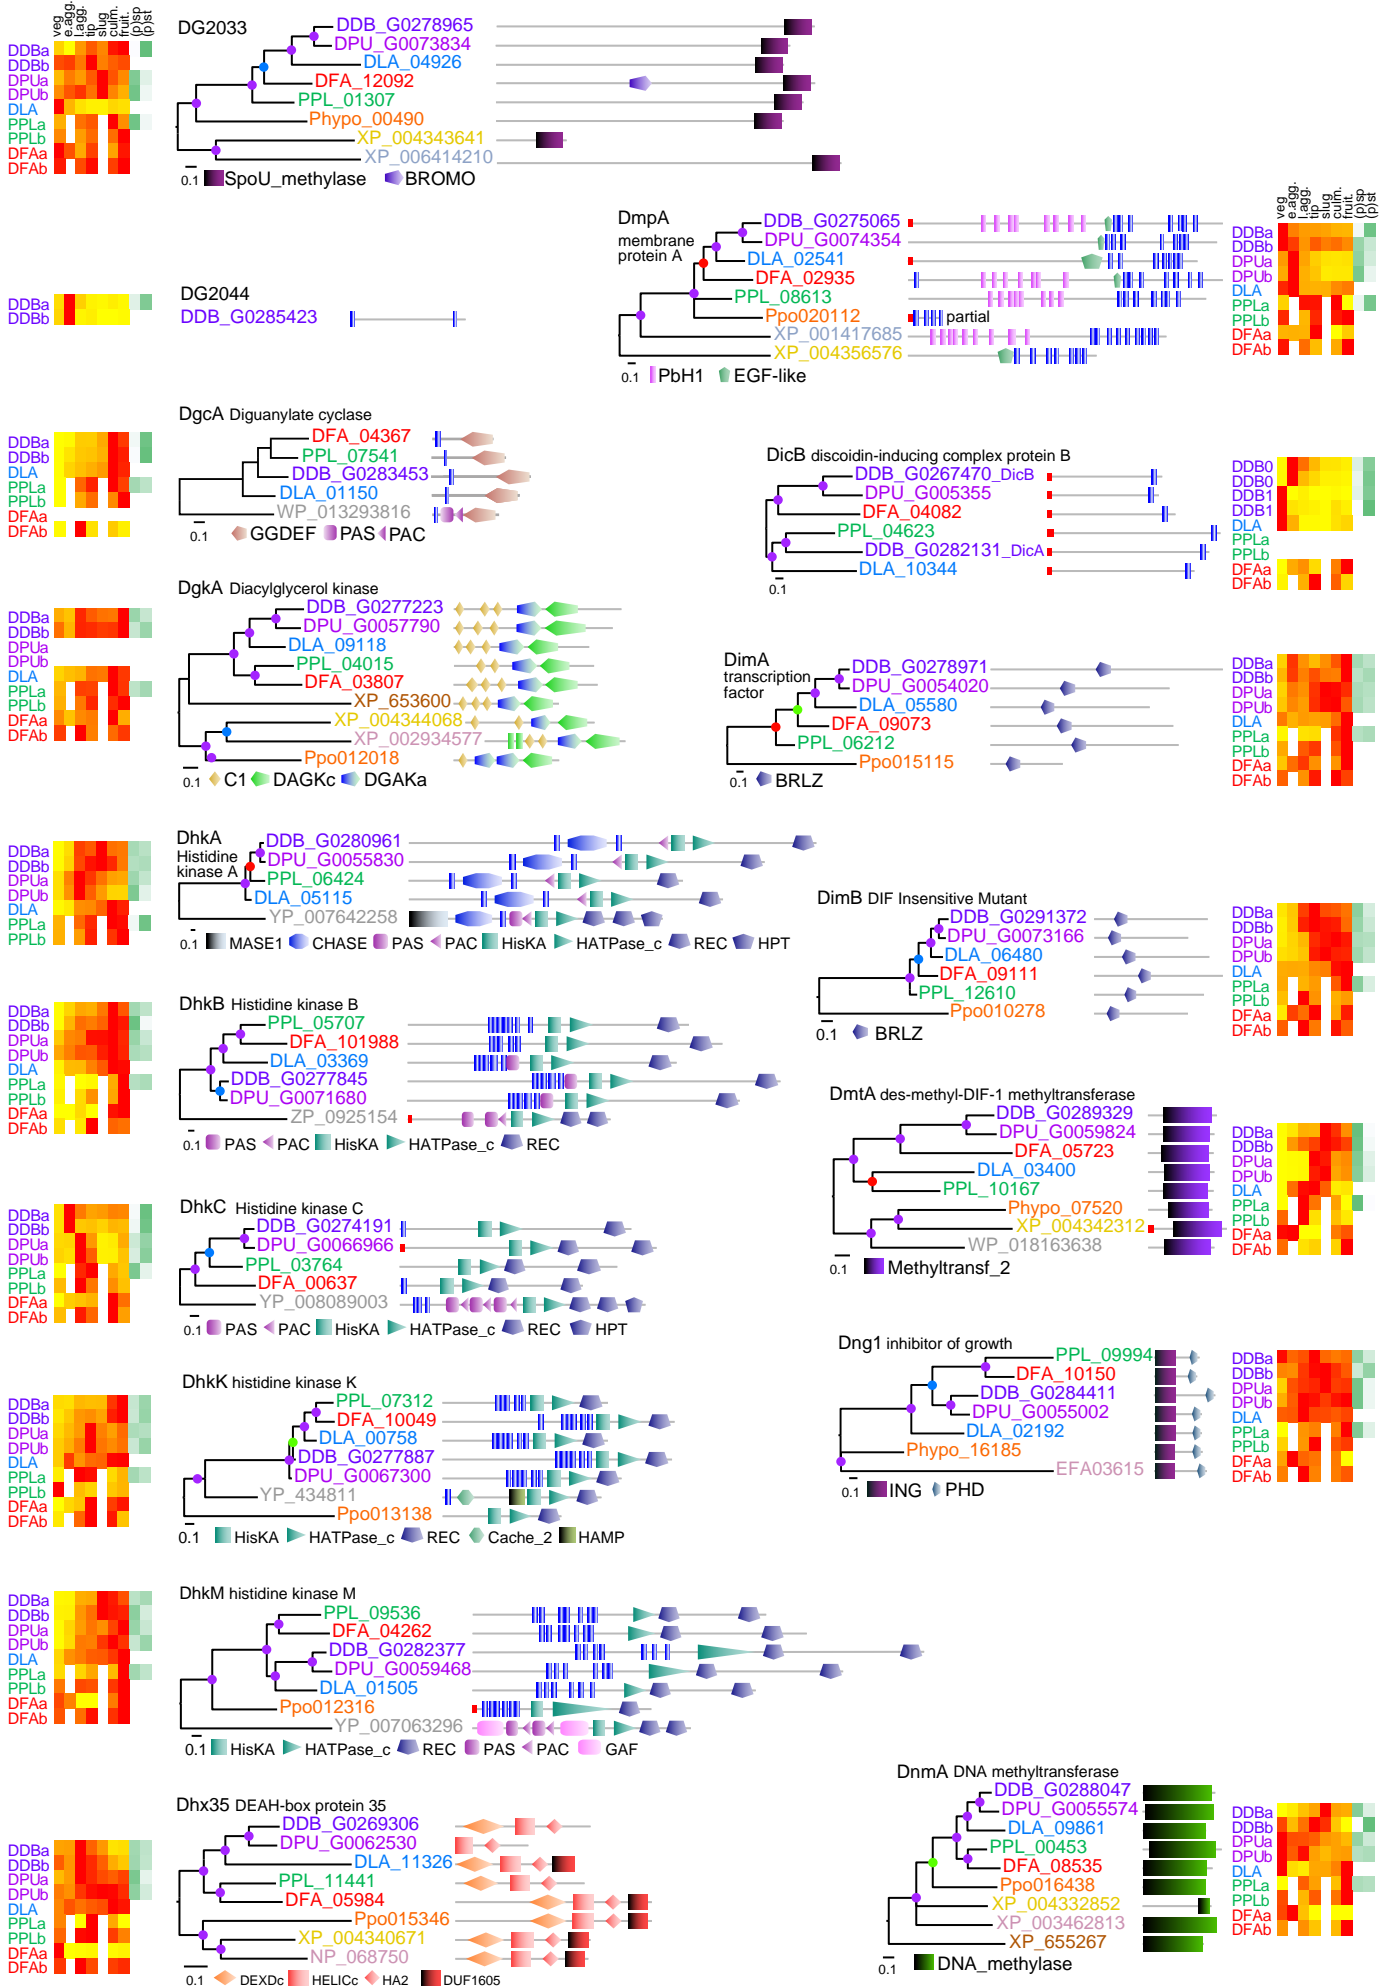

Do-Fr

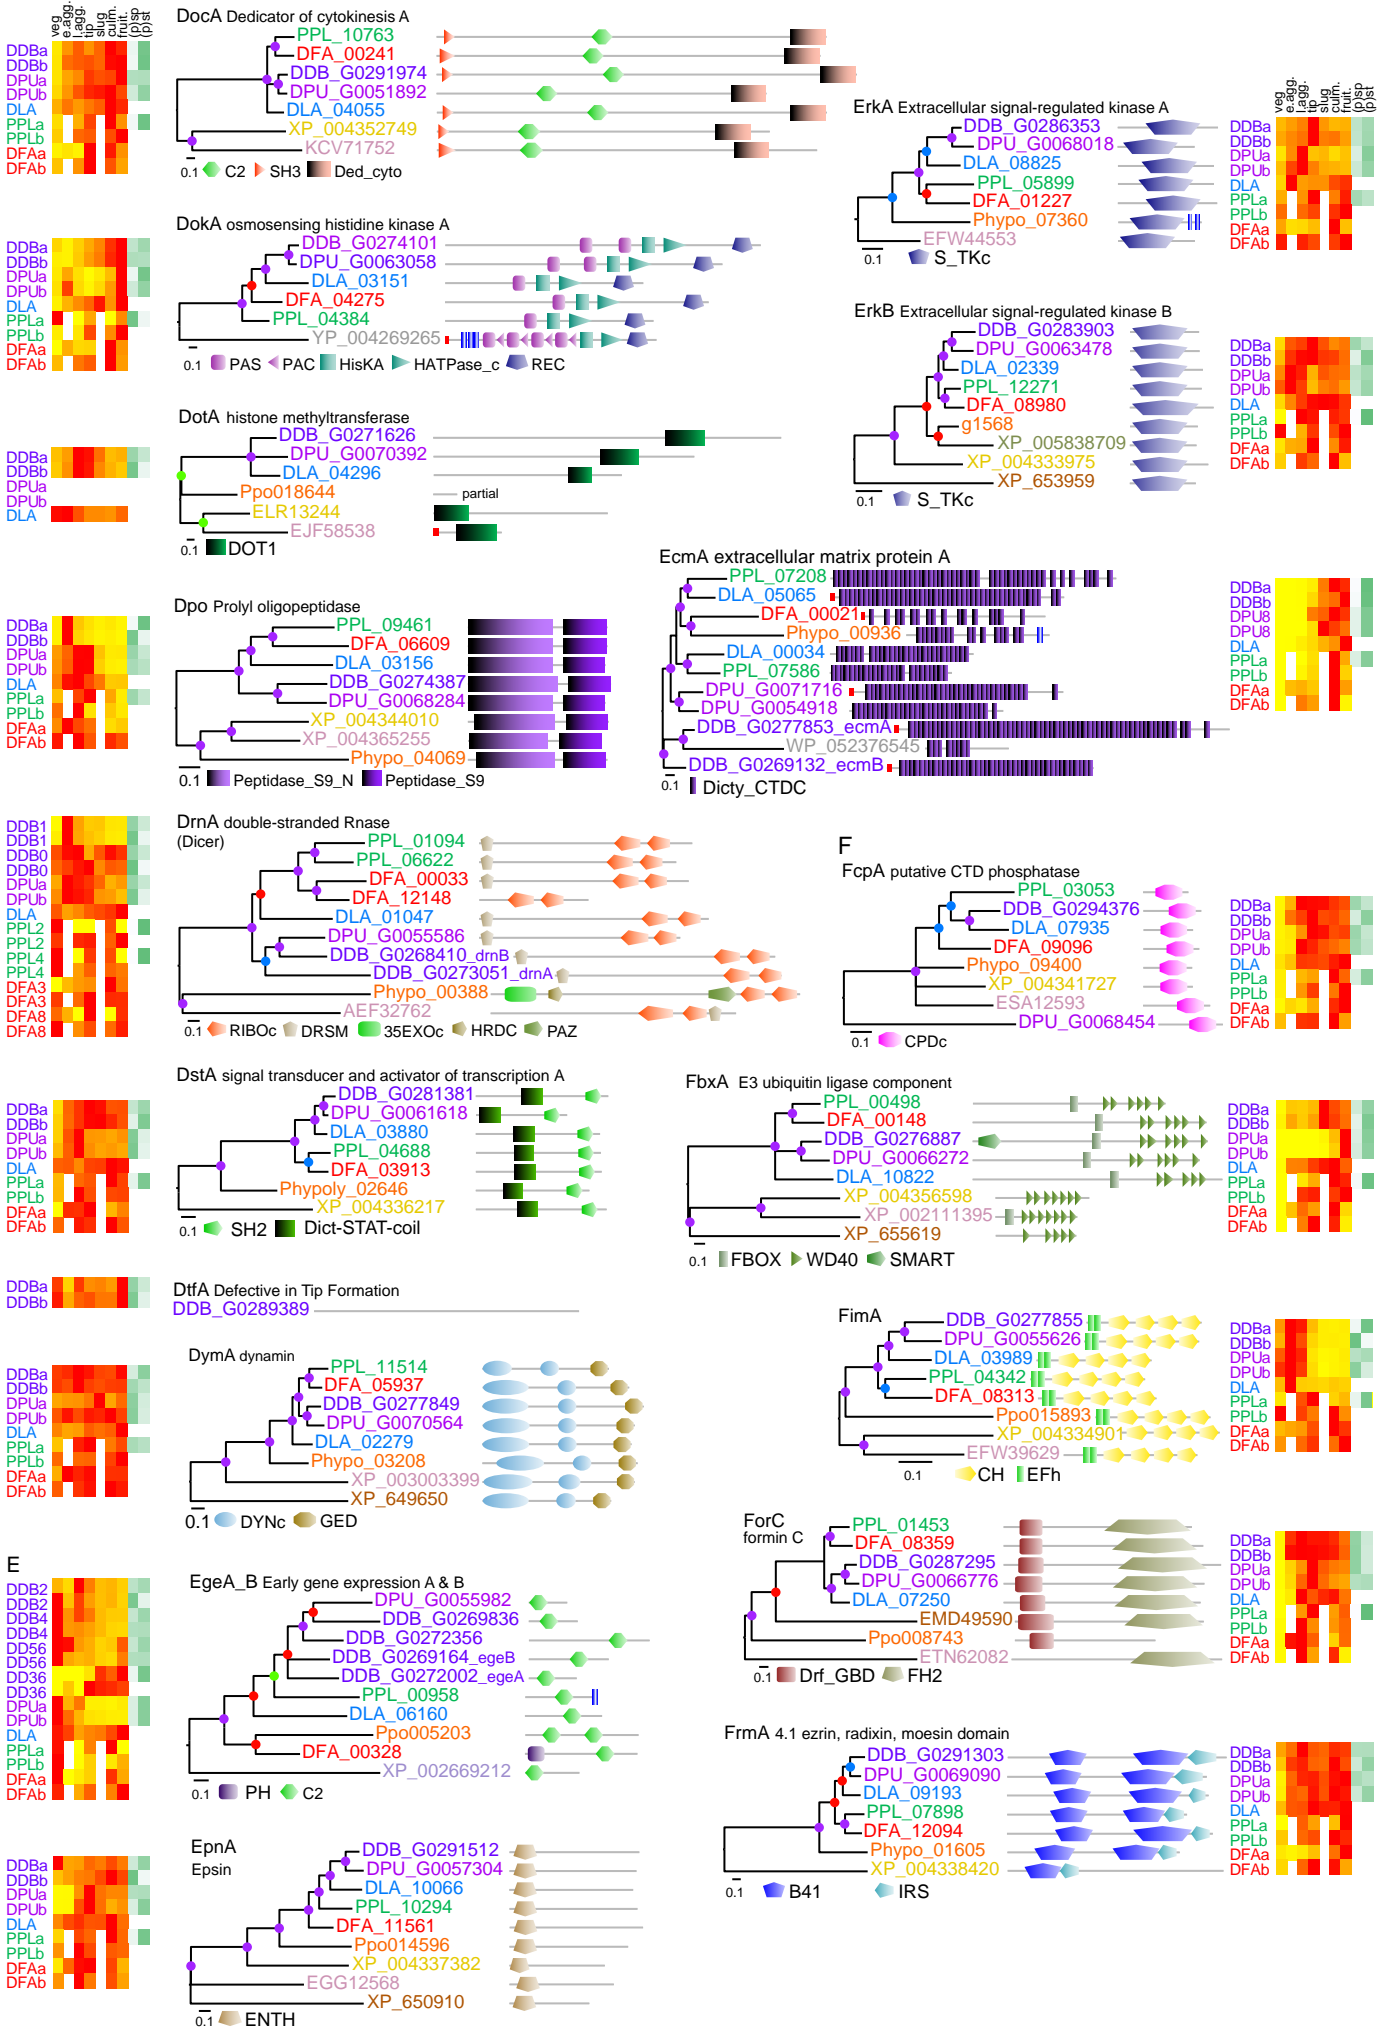

Fu-GefB

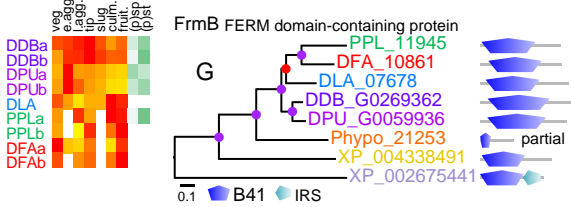

Gca guanylate cyclase A

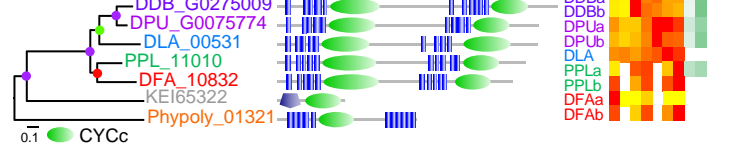

FutA Fucosyltransferase A

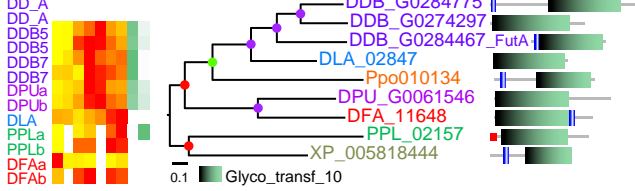

GcsA γ-glutamylcysteine synthetase

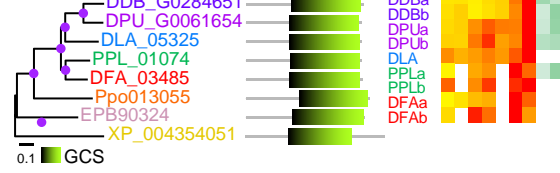

GabT GABA transaminase

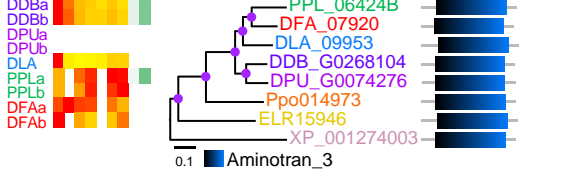

Gdt1 Growth-differentiation transition

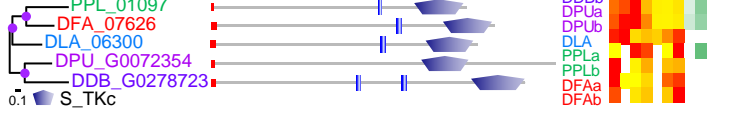

Gdt2 Growth-differentiation transition

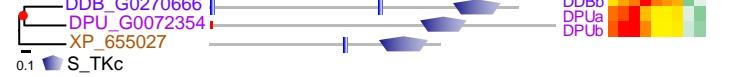

GacT GTPase activating factor for Rac

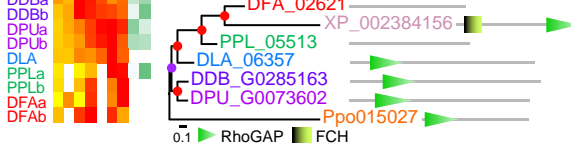

GefA Guanine nucleotide exchange factor

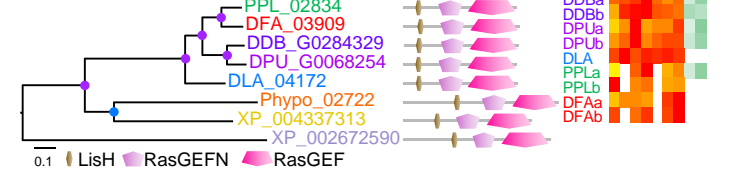

GadA\_B glutamate decarboxylases A & B

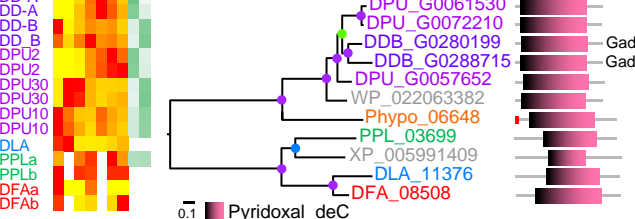

GefB Guanine nucleotide exchange factor

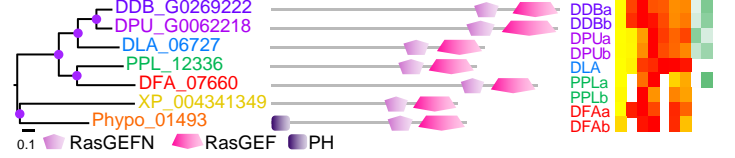

GbfA G-box binding factor

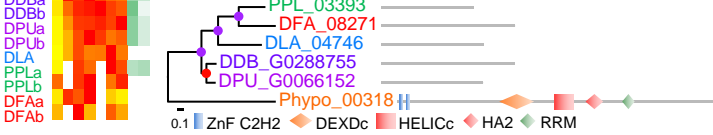

GbpC cGMP binding protein C

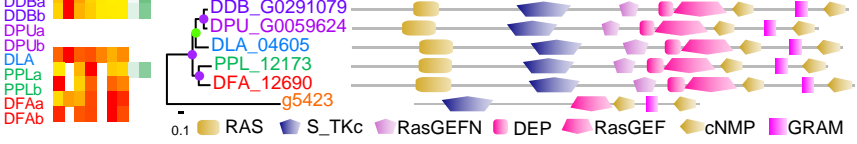

GbpD cyclic GMP binding protein

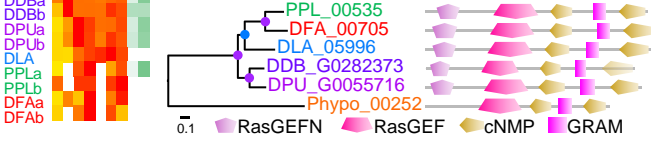

GbqA G-protein α subunit Q

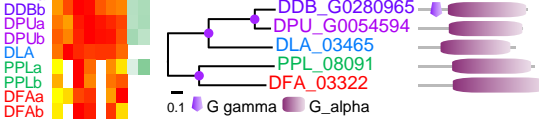

GefL-Grl

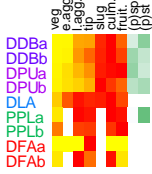

GefL Guanine nucleotide Exchange Factor L

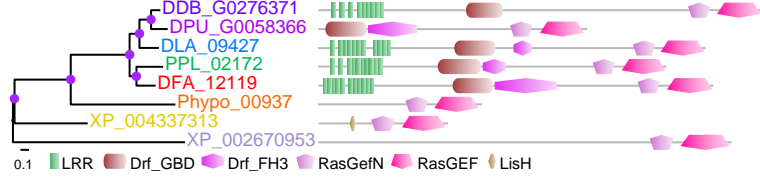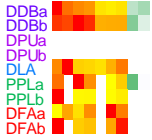

GefM Guanine nucleotide exchange factor

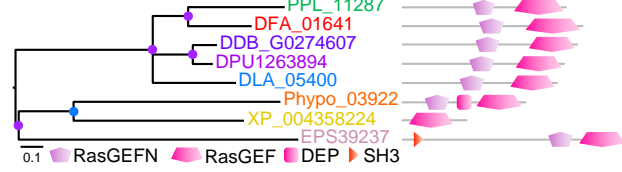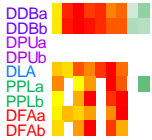

GefQ guanine nucleotide exchange factor Q

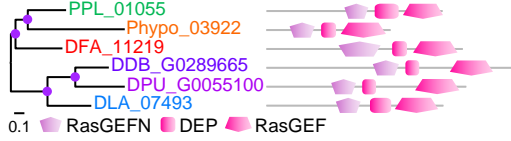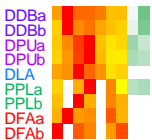

GgtA glycoprotein glucosyltransferase A

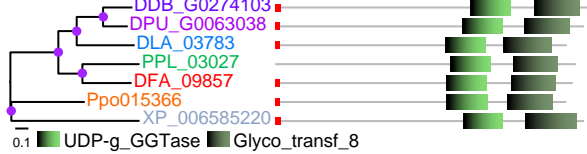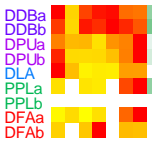

GlcS glycogen synthase

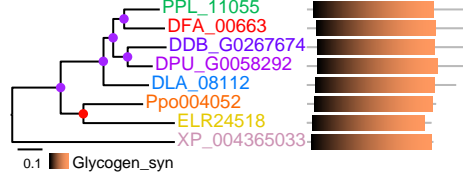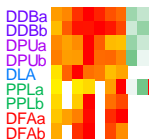

Gnt2 GlcNAc transferase ModB

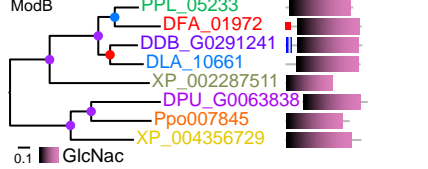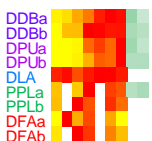

Gnt15 GlcNAc transferase

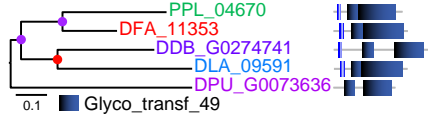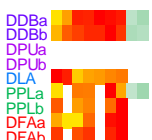

GpaA G-Protein Alpha 1

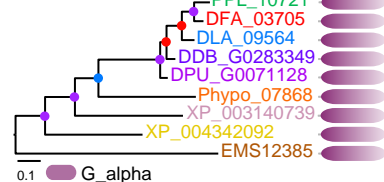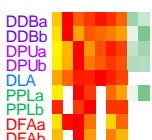

GpaB G-protein alpha 2

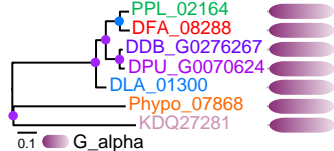

GpaC G-Protein Alpha 3

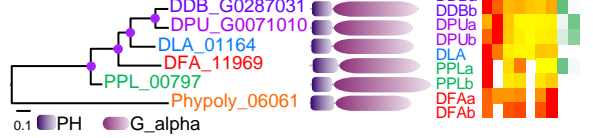

GpaD G-protein alpha 4

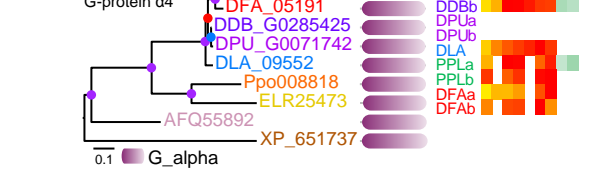

GpaE G-protein alpha 5

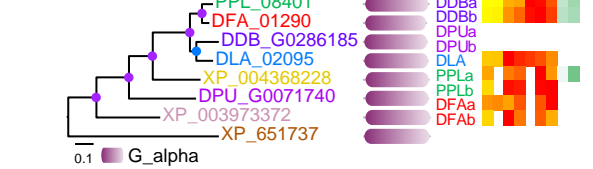

GpaI G-protein alpha 9

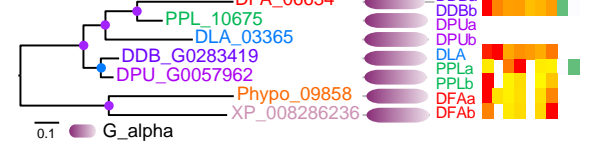

GpbA G protein beta subunit

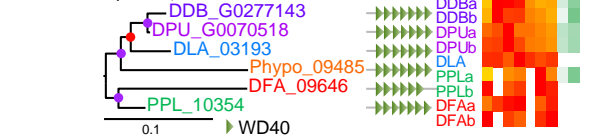

GrlA and GrlJ GABA-like receptors A&J

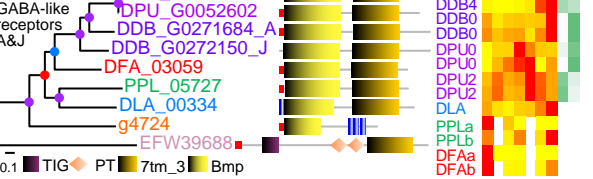

GrlB metabotropic glutamate receptor-like

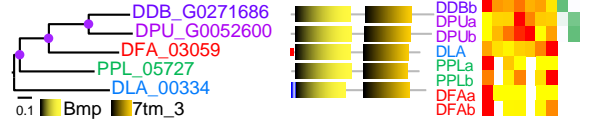

GrlE GABA-like receptor E

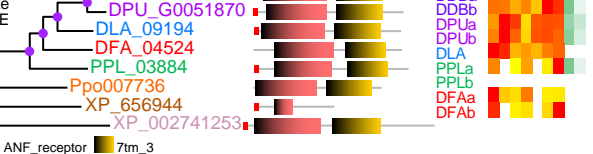

Grp-Ip

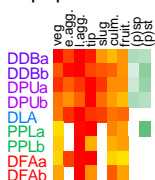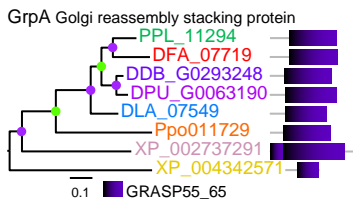

HelC DEAD-box RNA helicase

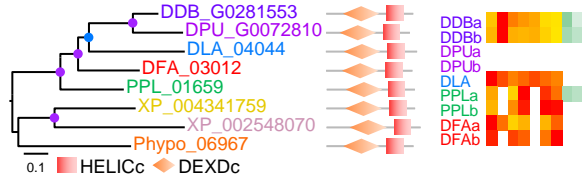

GsKA glycogen synthase kinase A

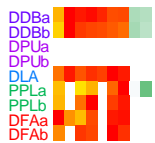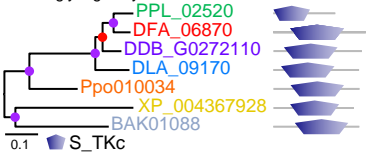

HelF RNA helicase F

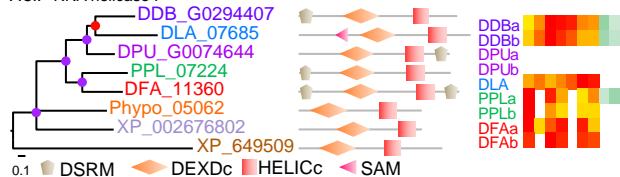

Gsr Glutathione-SH Reductase

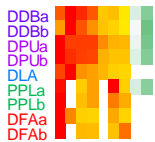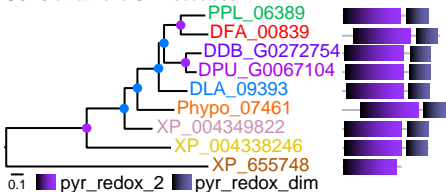

HipA clathrin-associated protein Hip1r

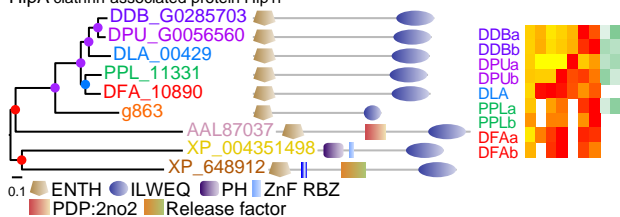

GtaC GATA-binding transcription factor C

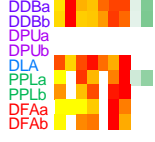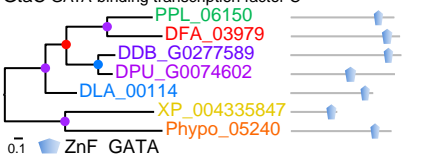

HspA Heat shock protein A

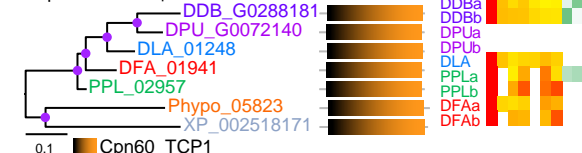

GtaG Gata G

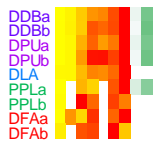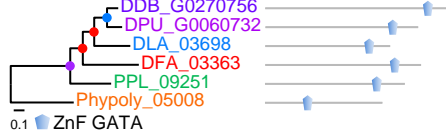

IcmA isoprenylcysteine methyltransferase

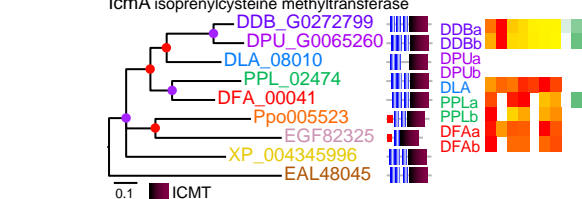

Gxct Guanine exchange factor for Rac

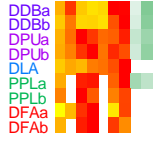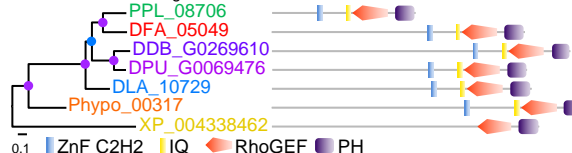

HdaB histone deacetylase B

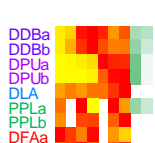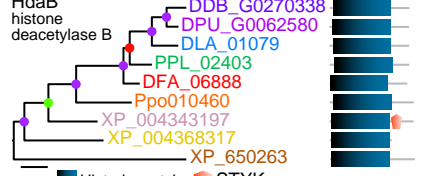

Ino1 inositol-3-phosphate synthase

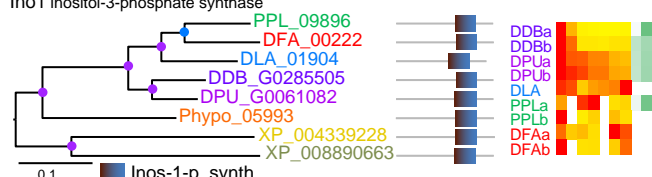

Htt huntingtin

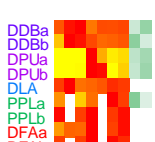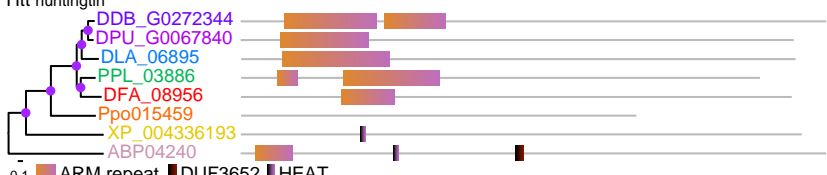

Ifk\_B Initiation factor kinase

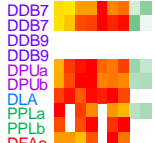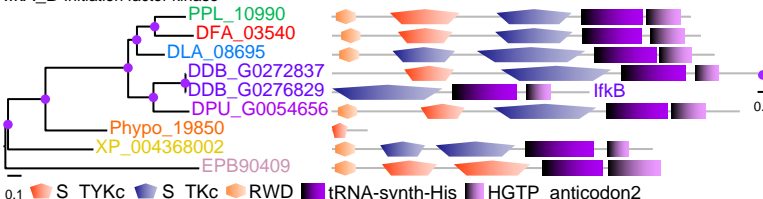

iptA isopentenyltransferase

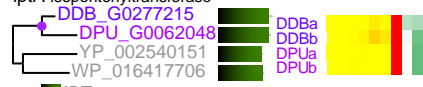

IplA inositol 1,4,5-trisphosphate receptor-like protein A

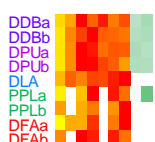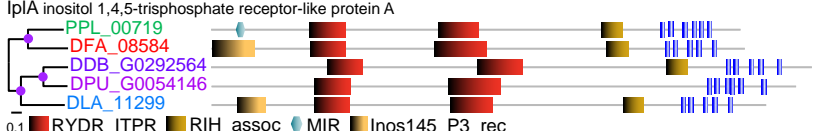

Kc-Mhka

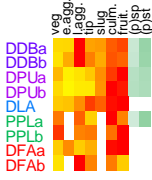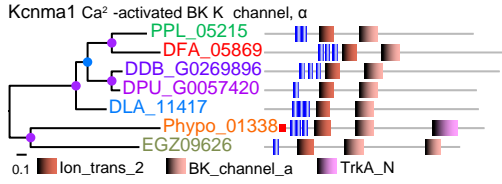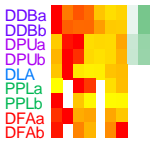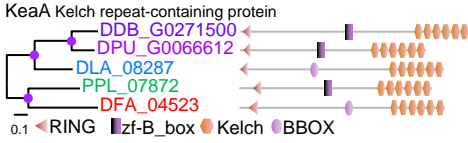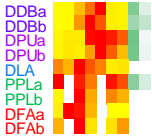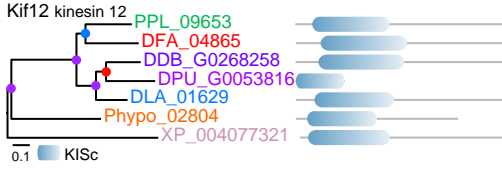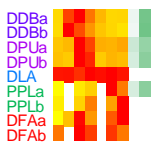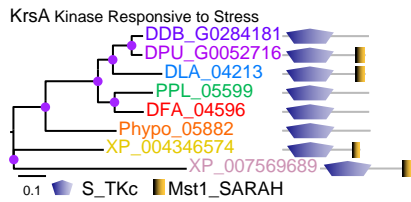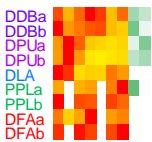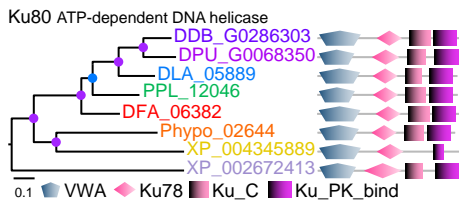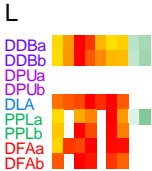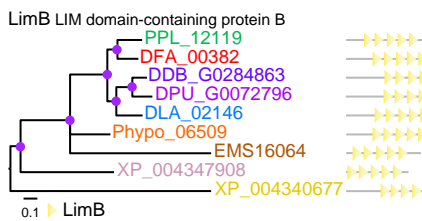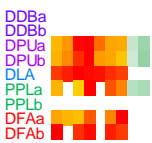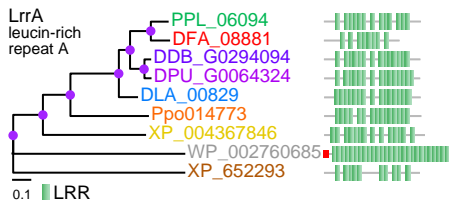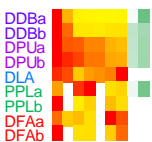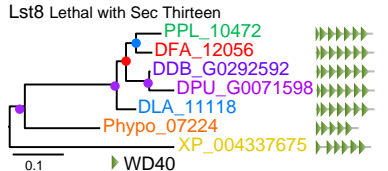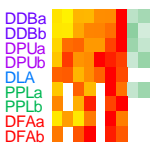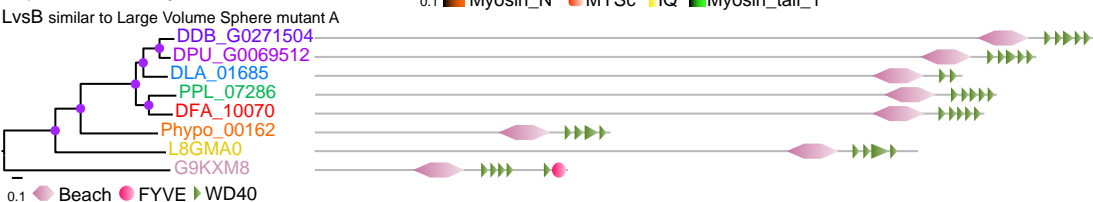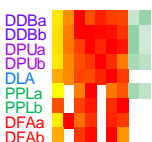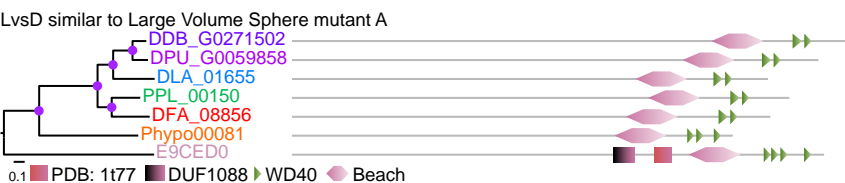

M

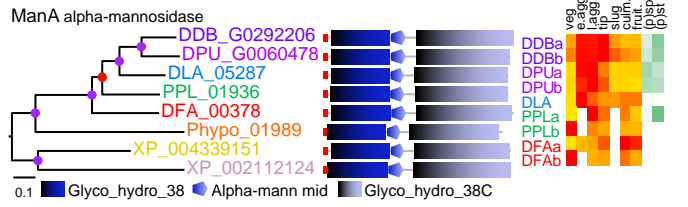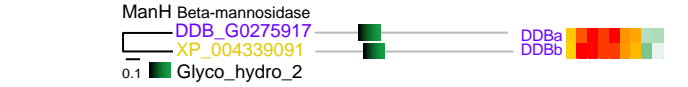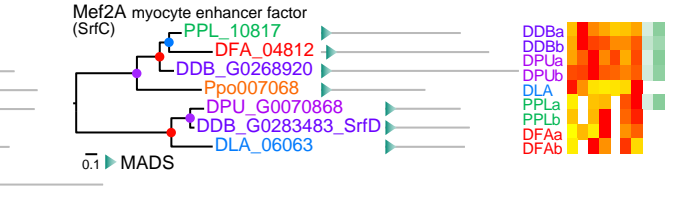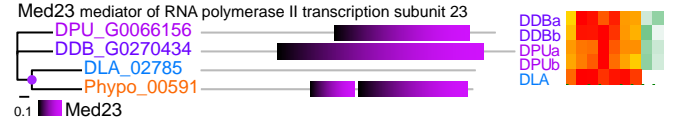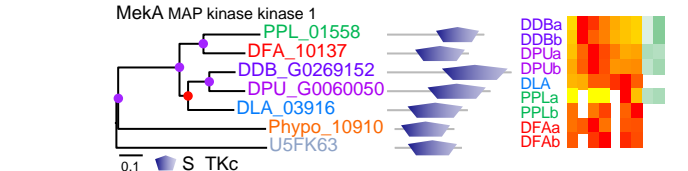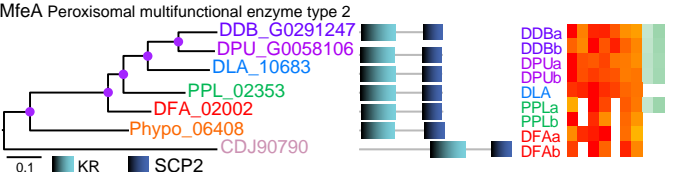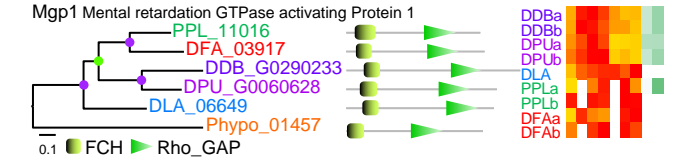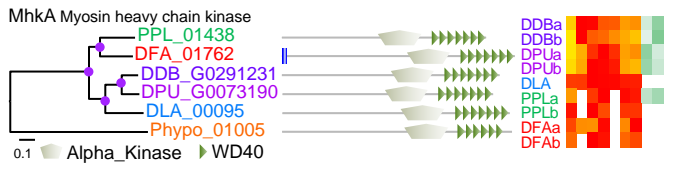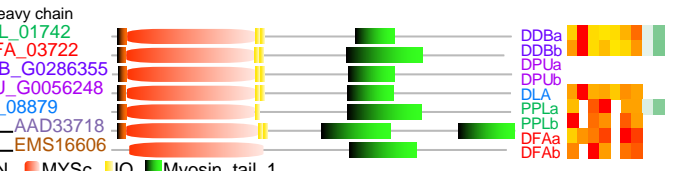

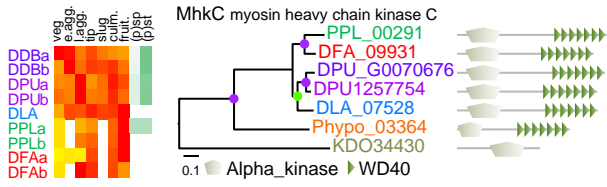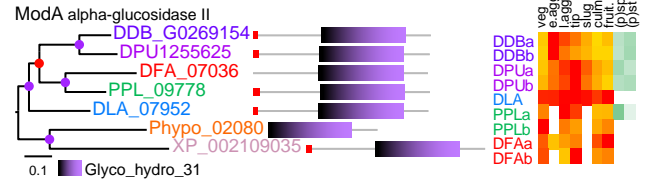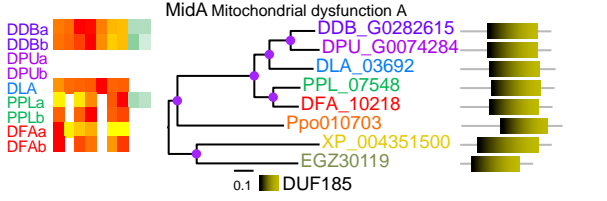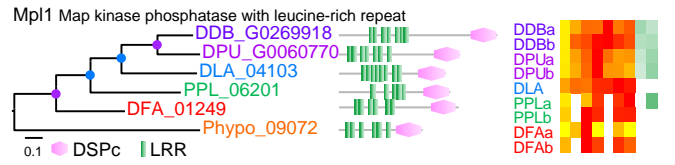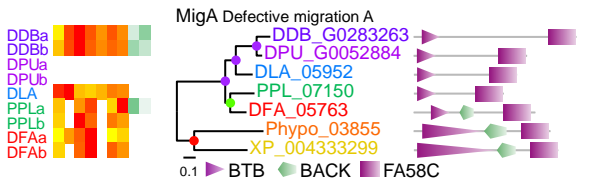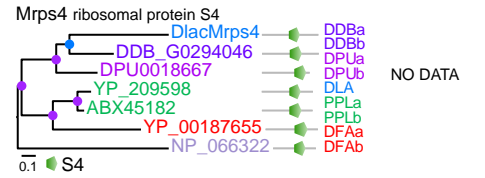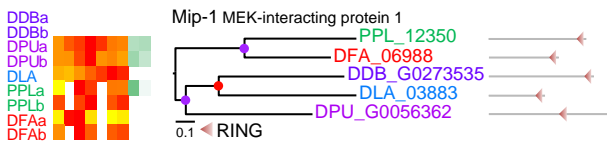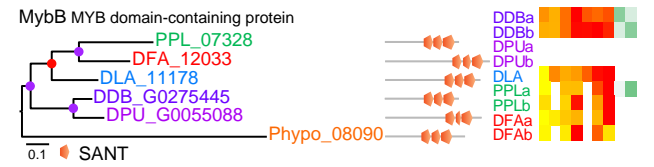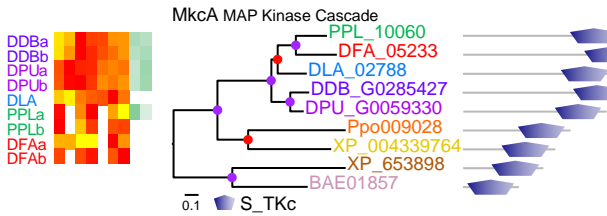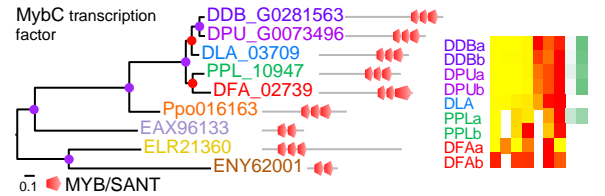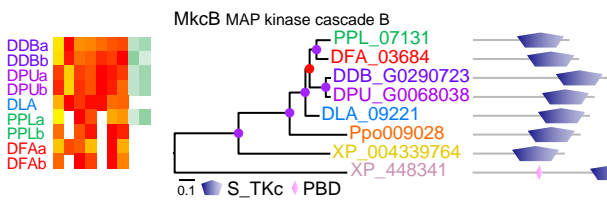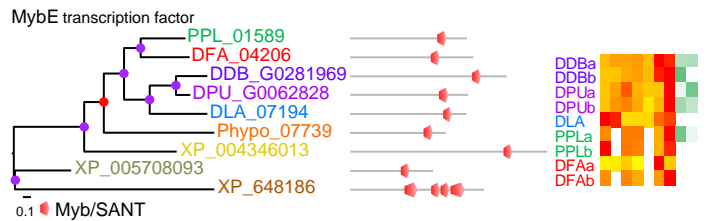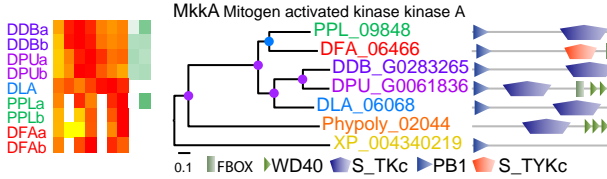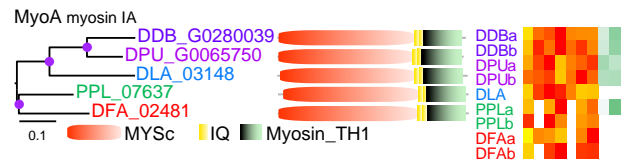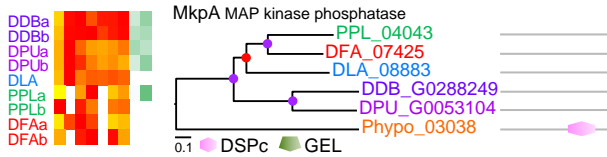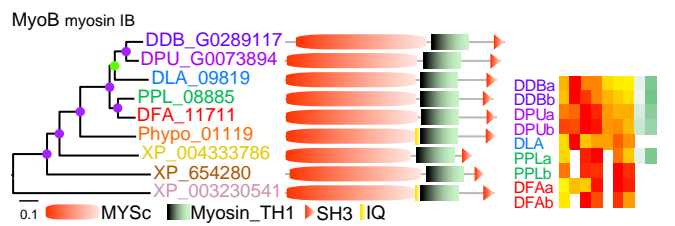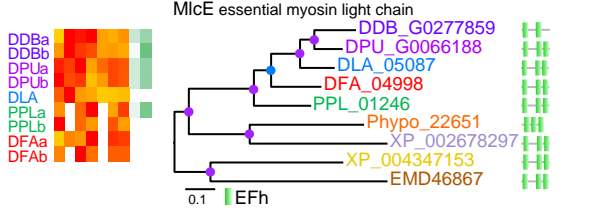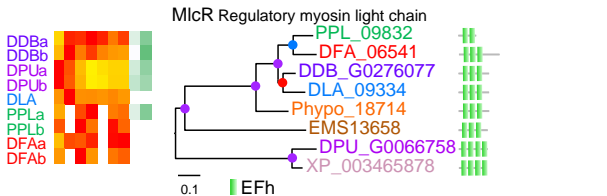

MyoG-Pad

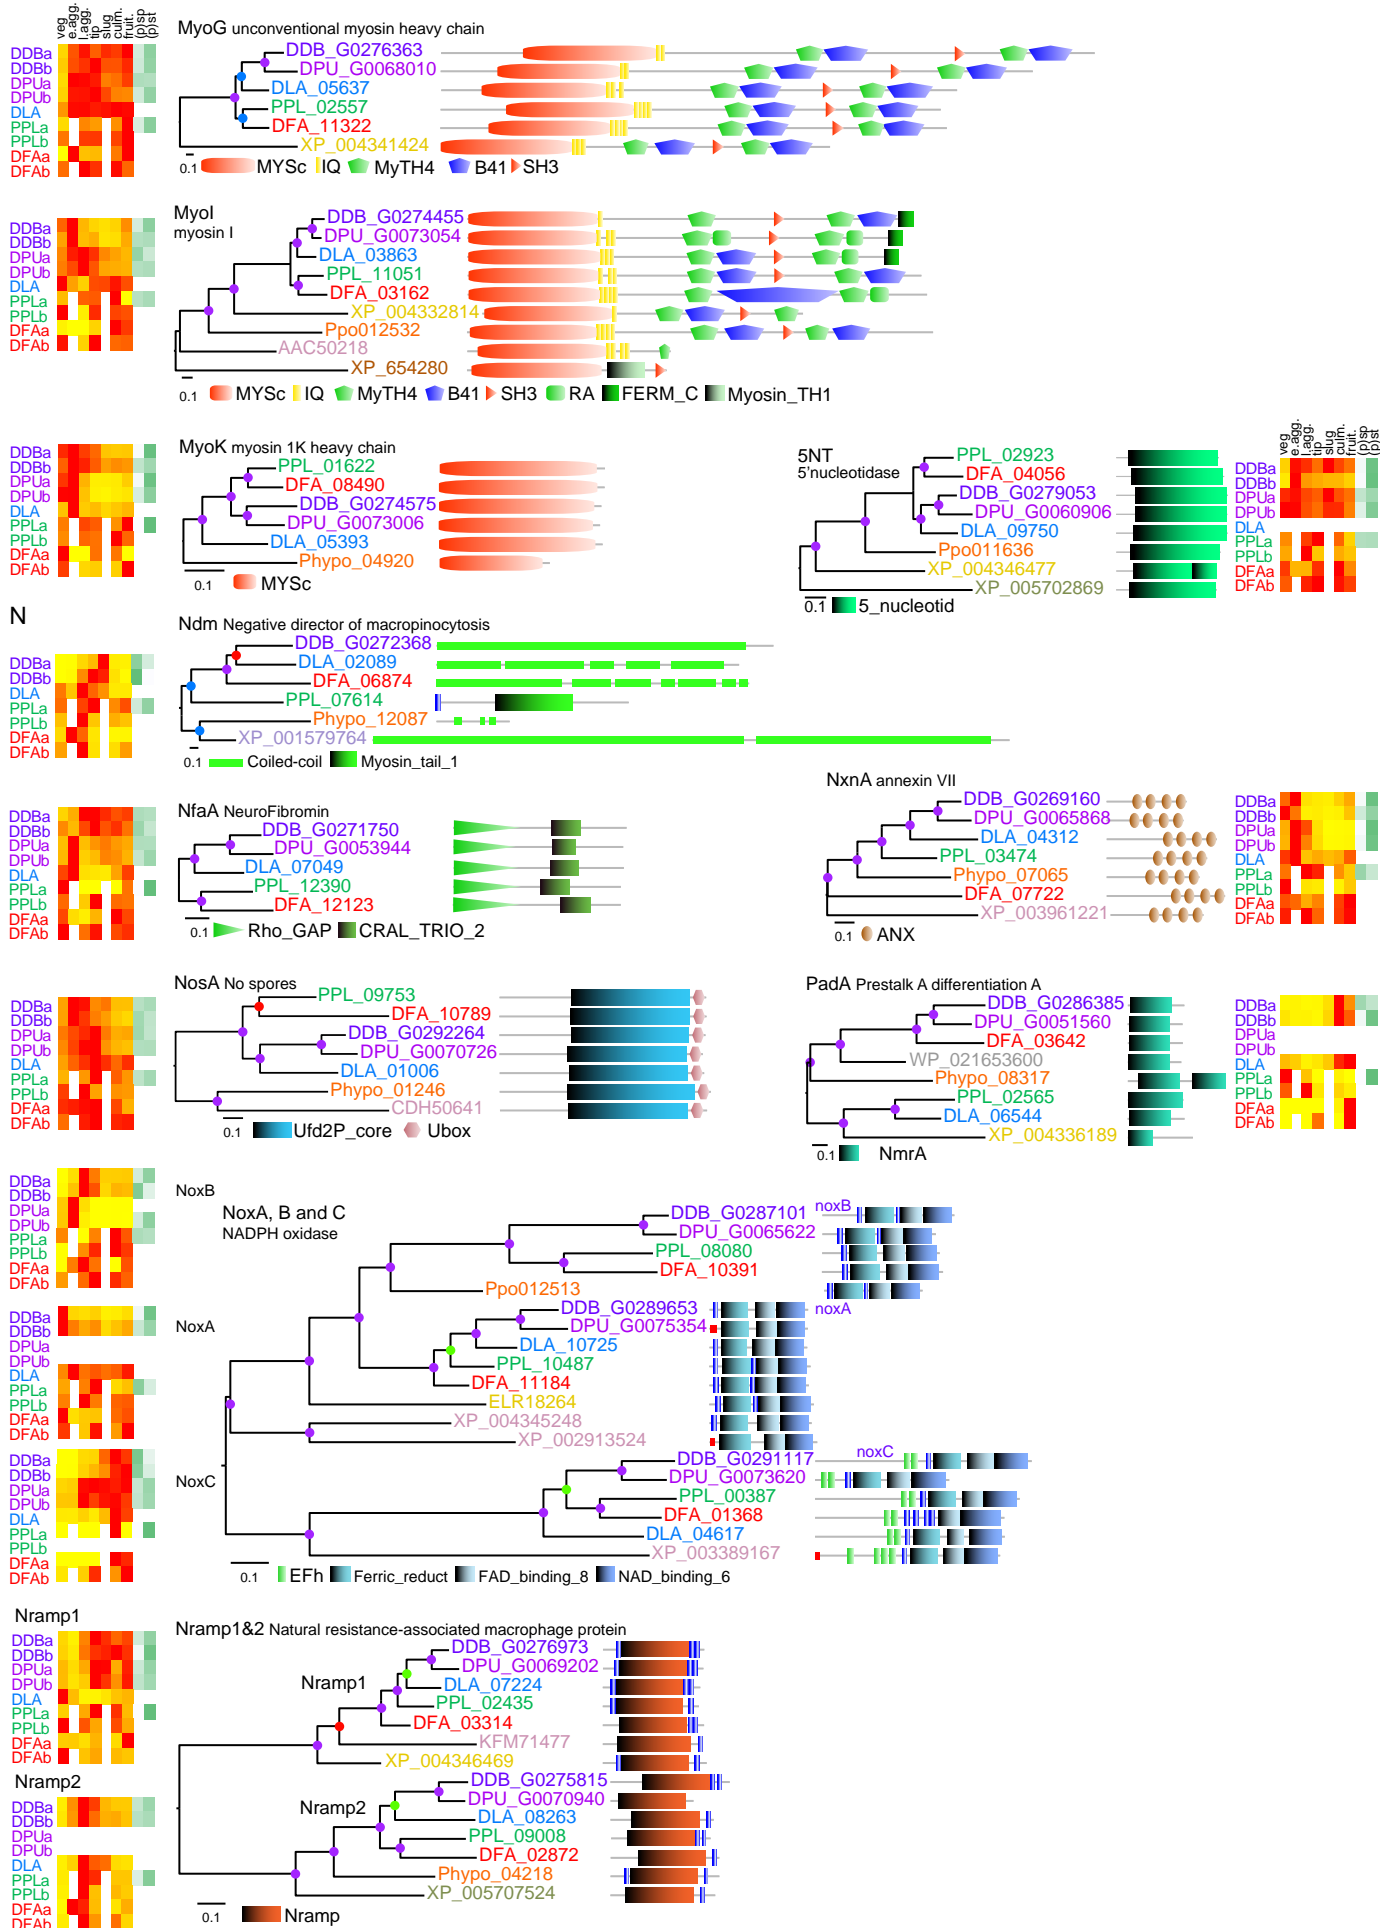



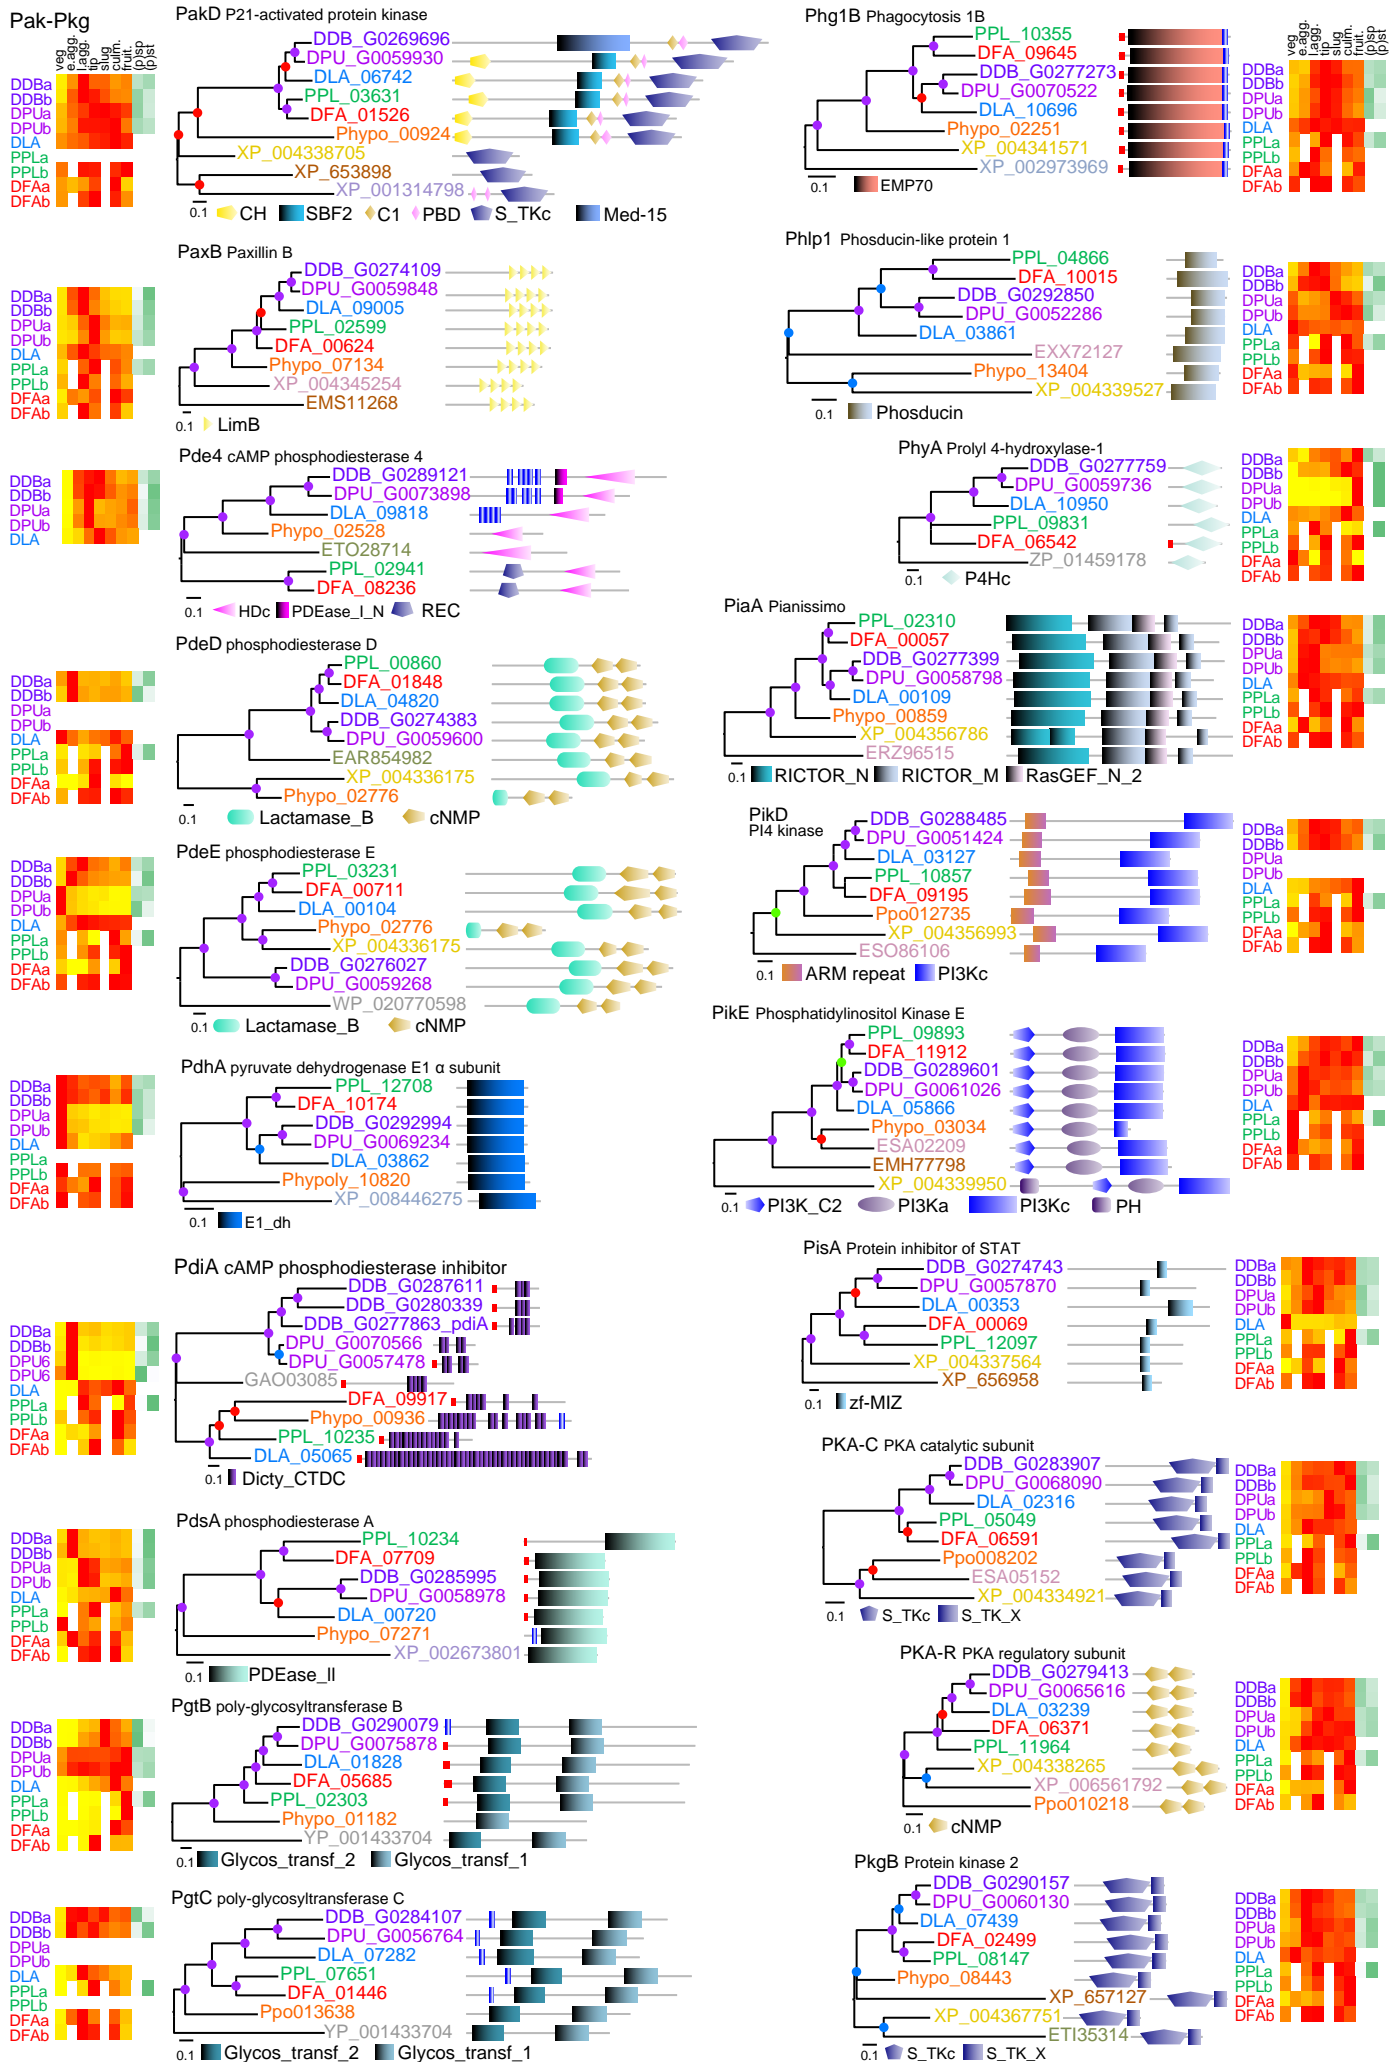

Pla-Pt

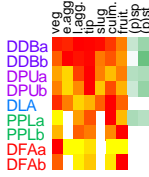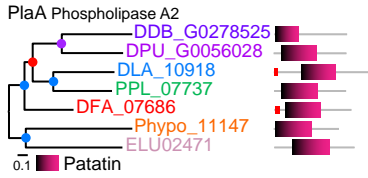

Ppk1 polyphosphate kinase 1

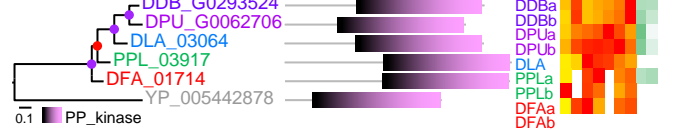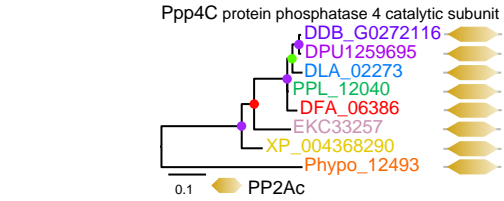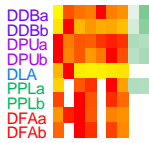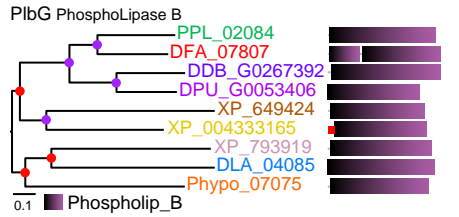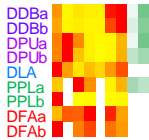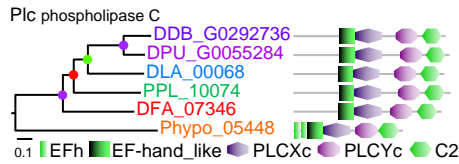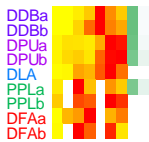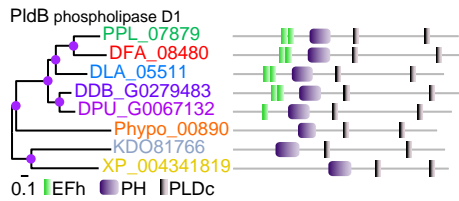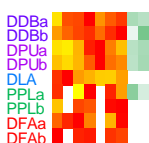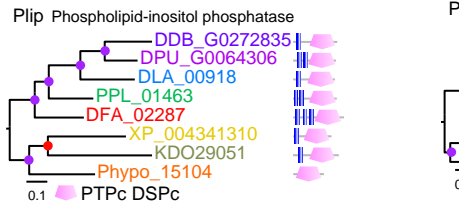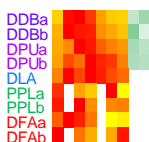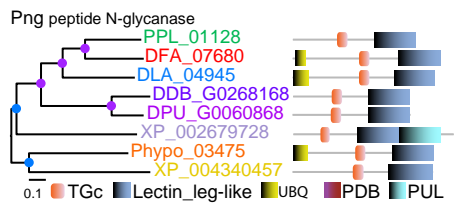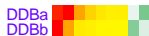

**Pon A ponticuln**  
DDB\_G0293522

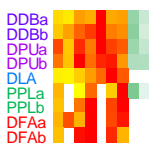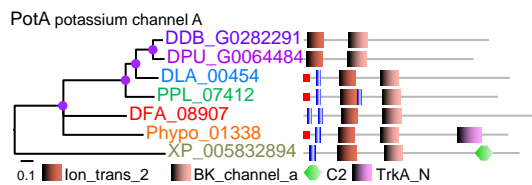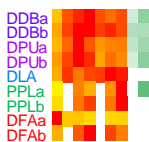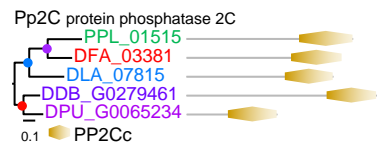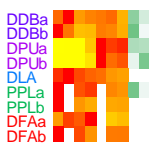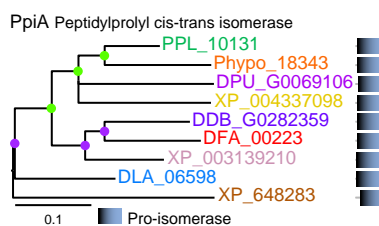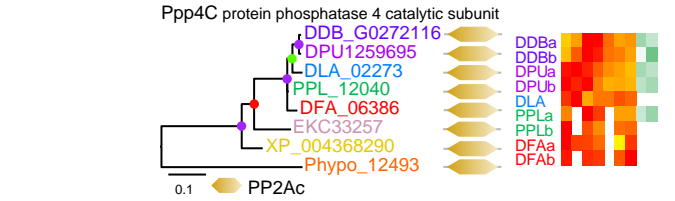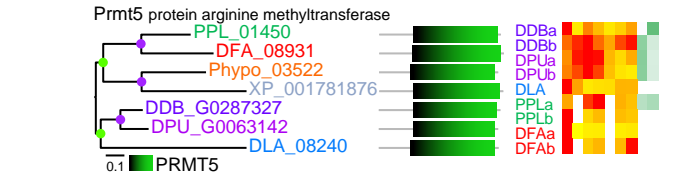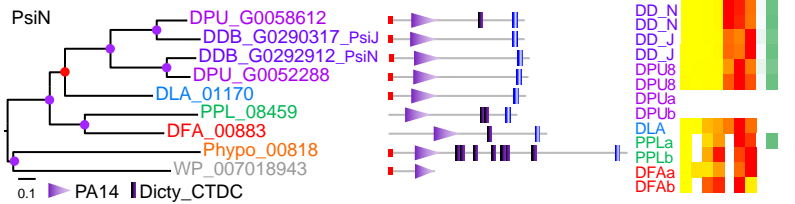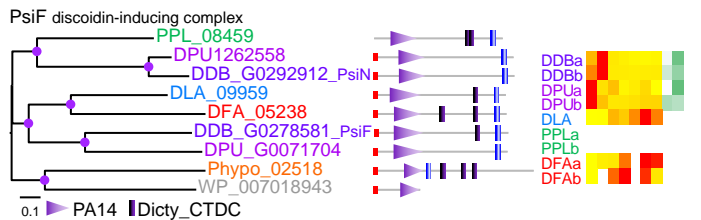

**PsiA PreSporeLess A**  
DDB\_G0267410

DDBa no data  
DDBb no data

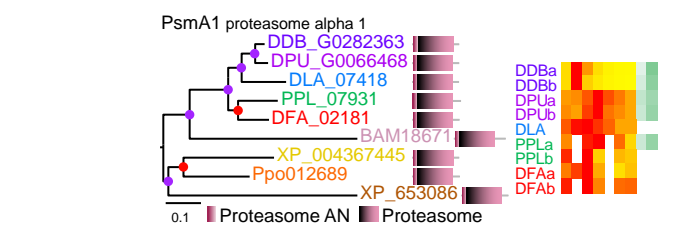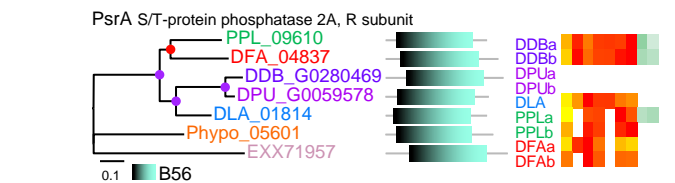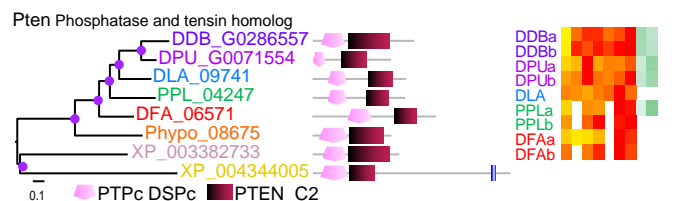

Ptp-Rip

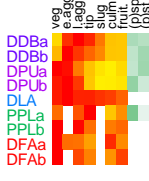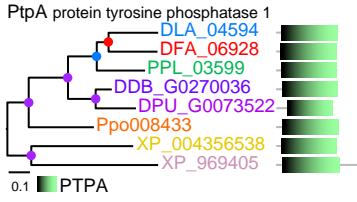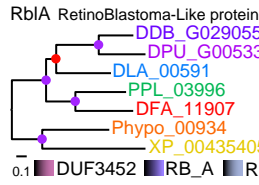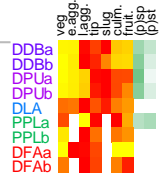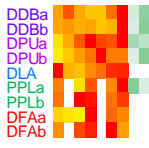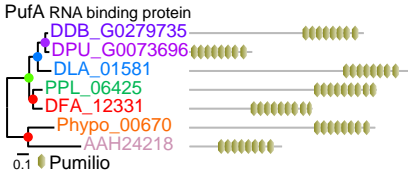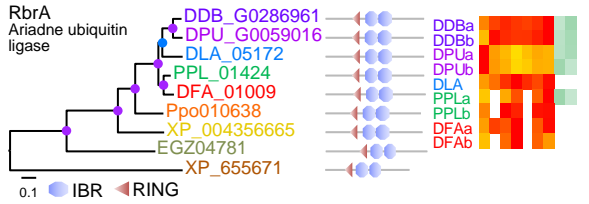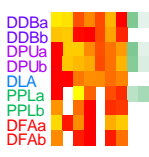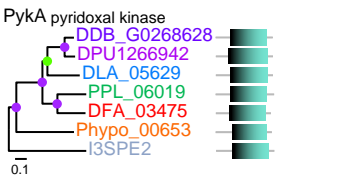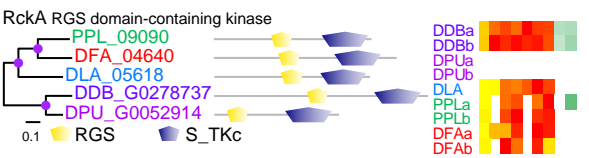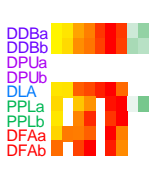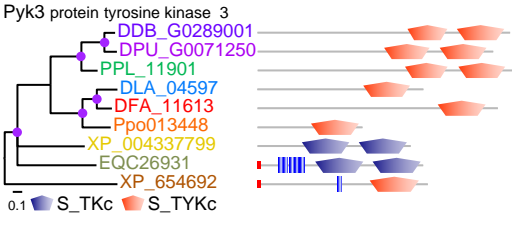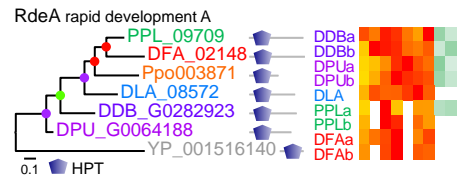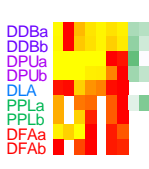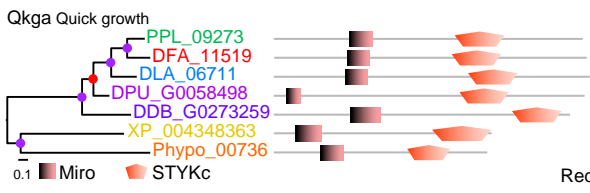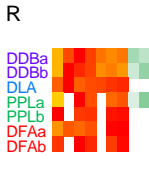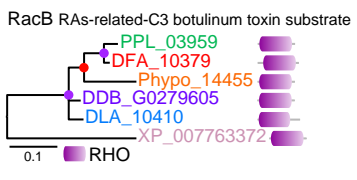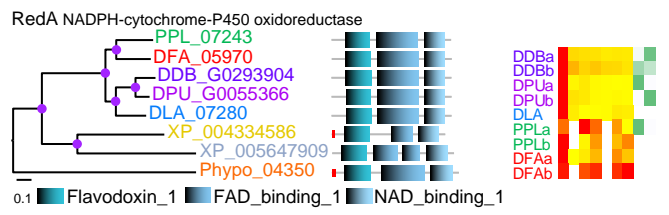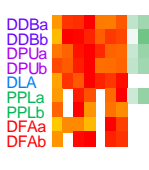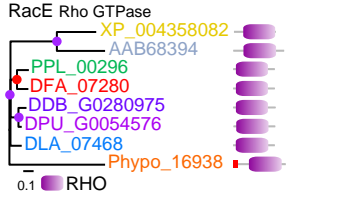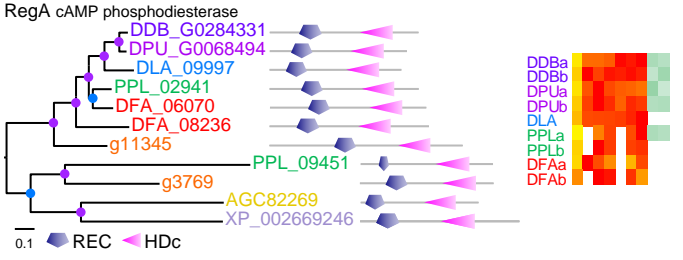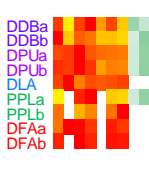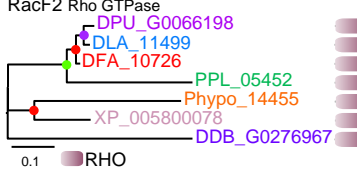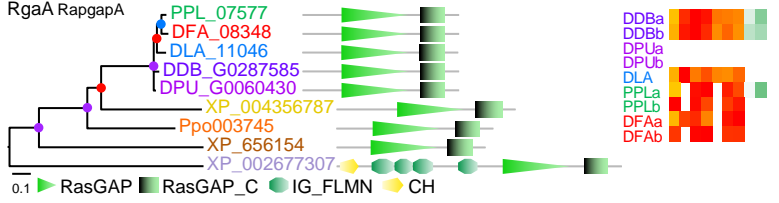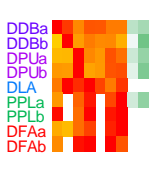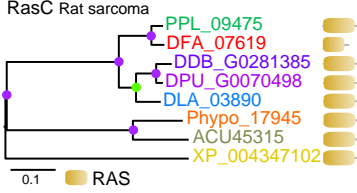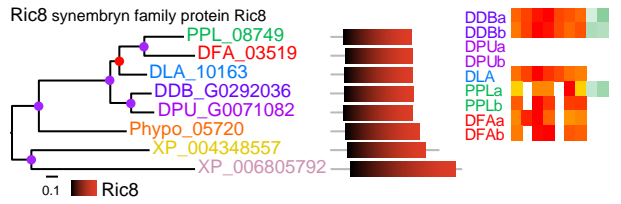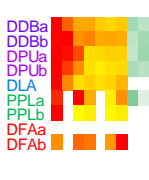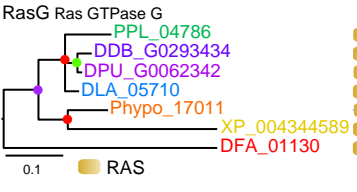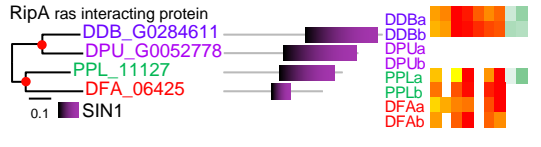

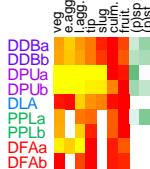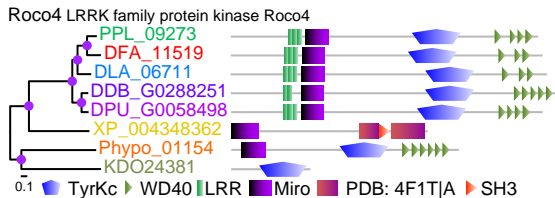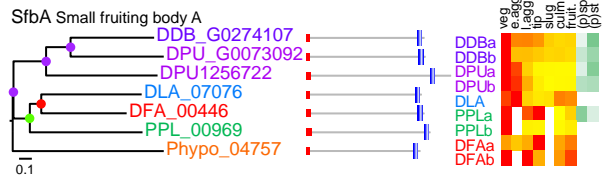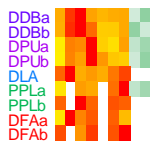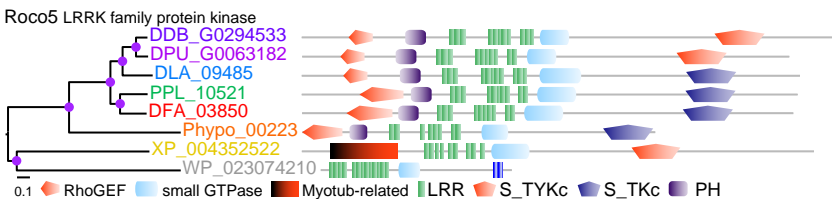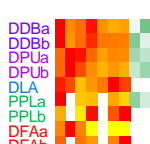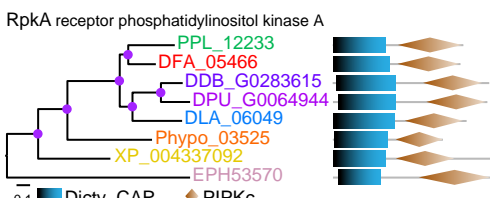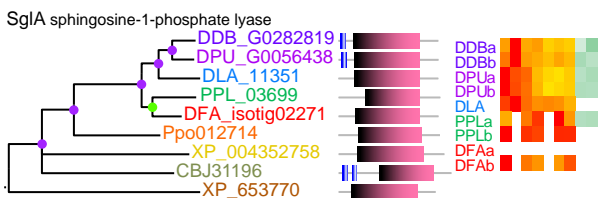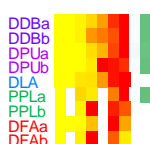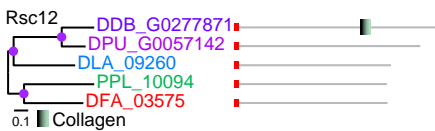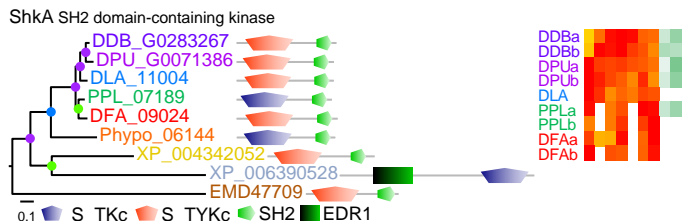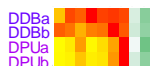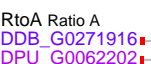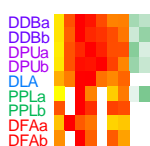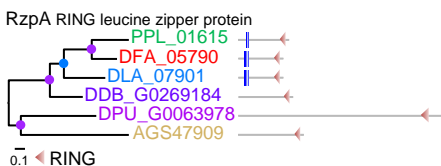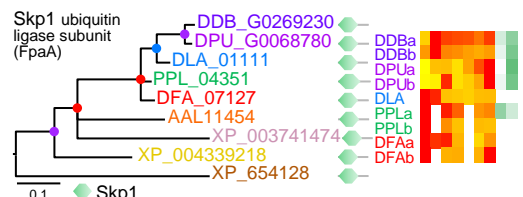

S

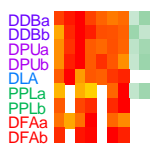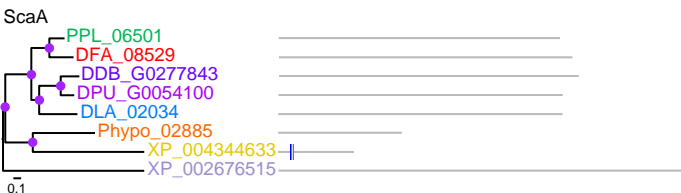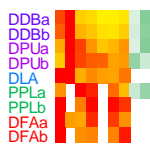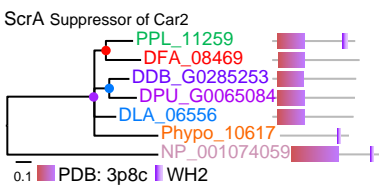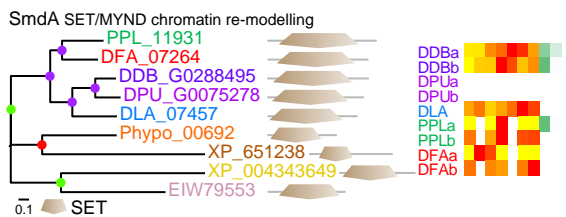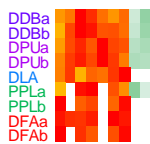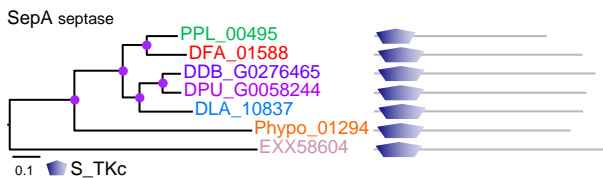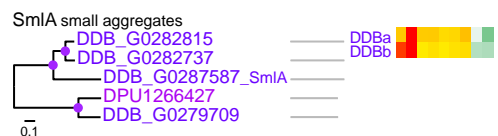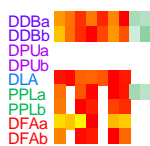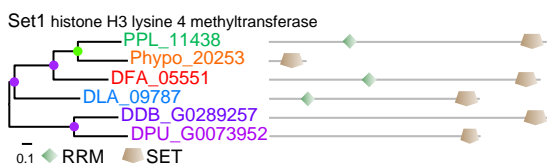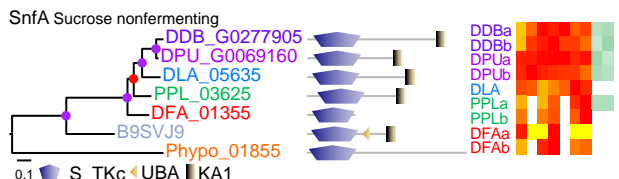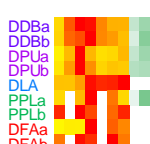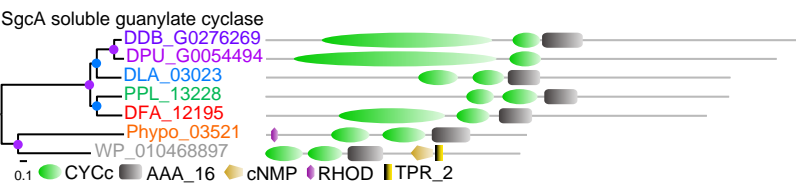

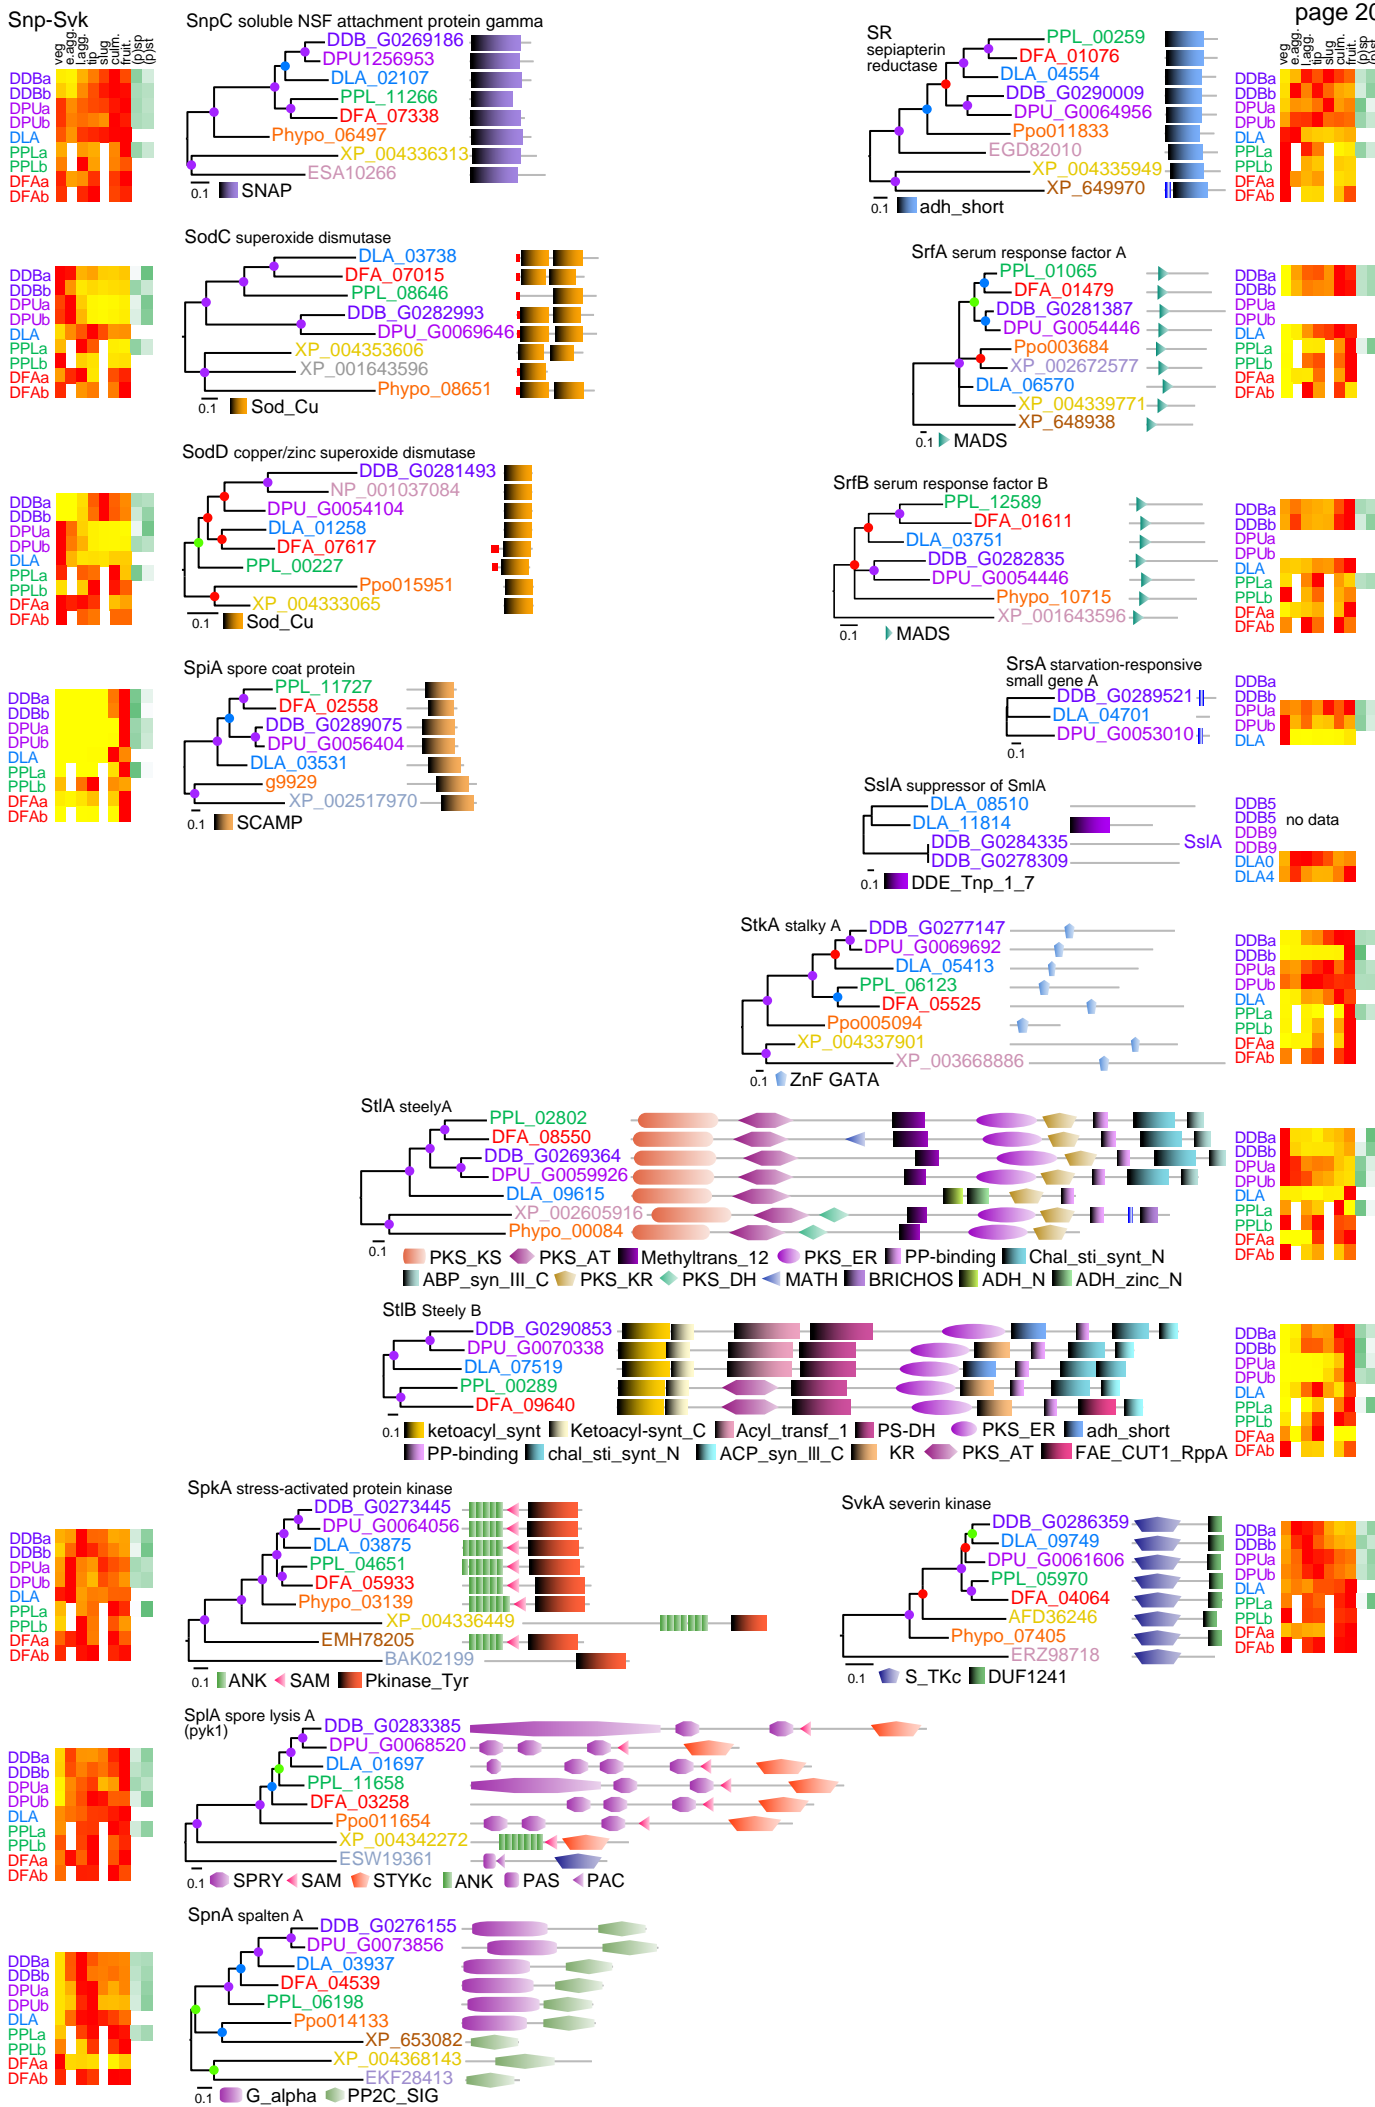

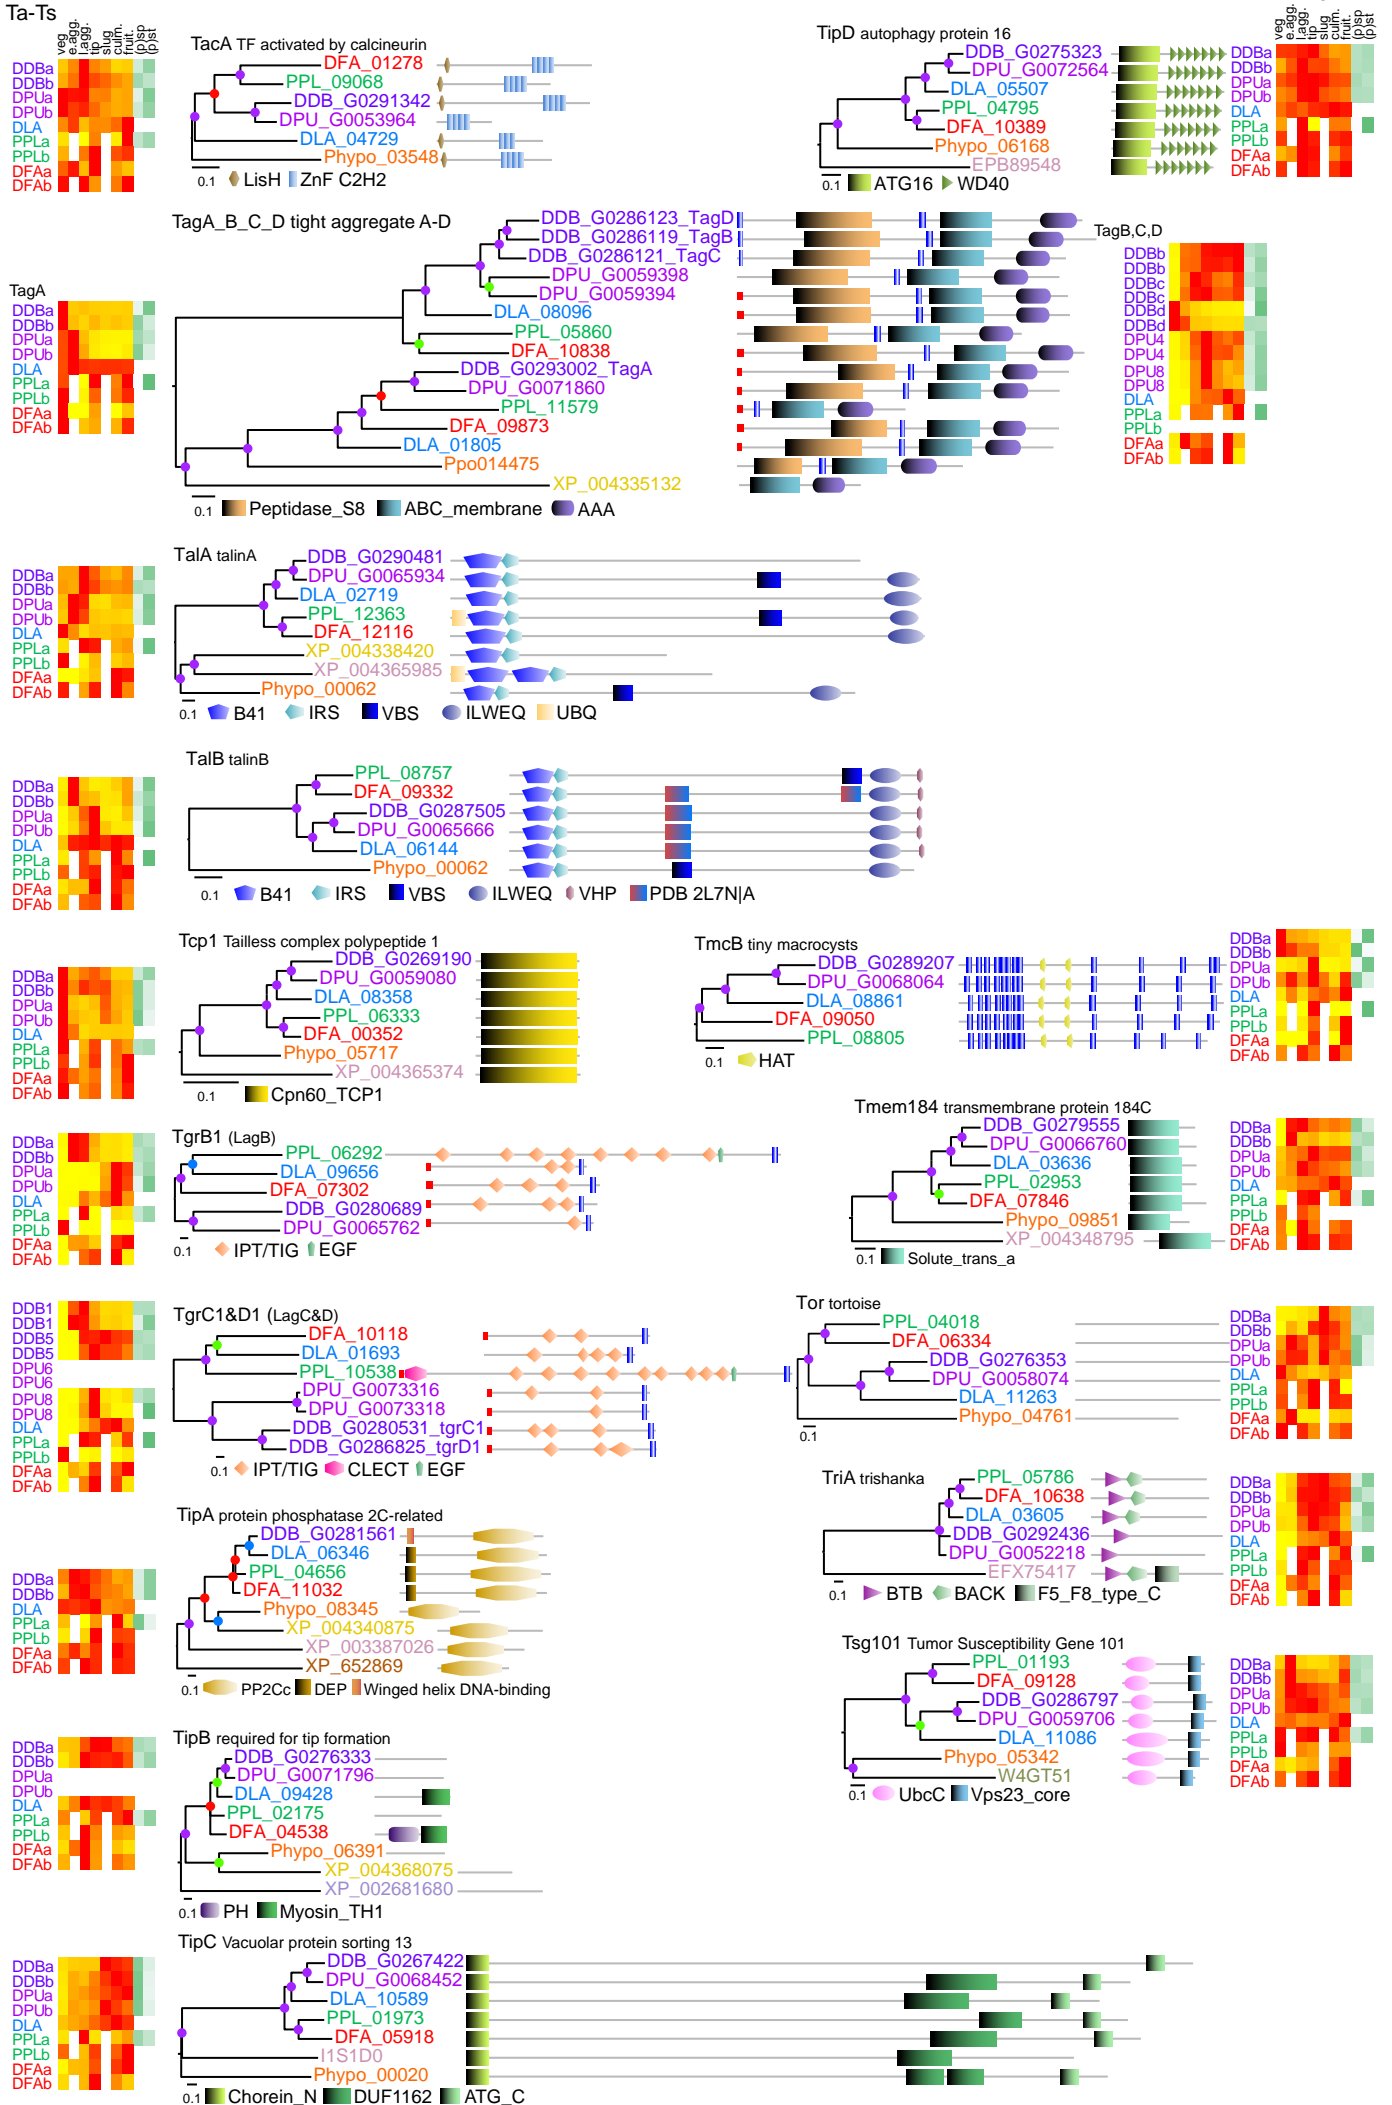

Tsu-Zi

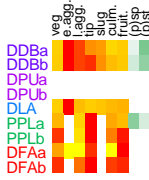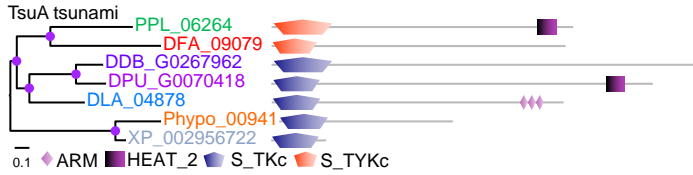

U

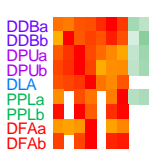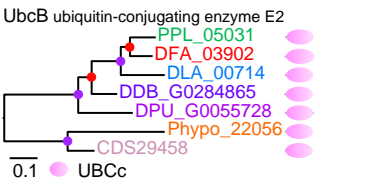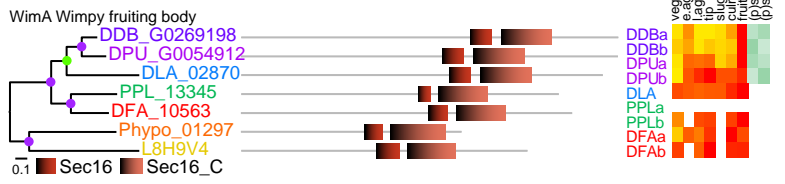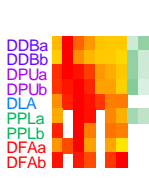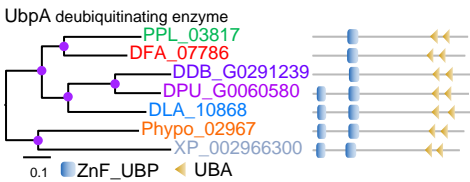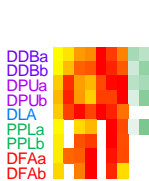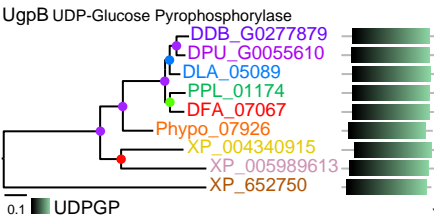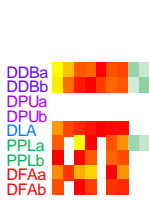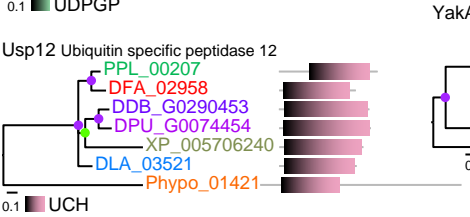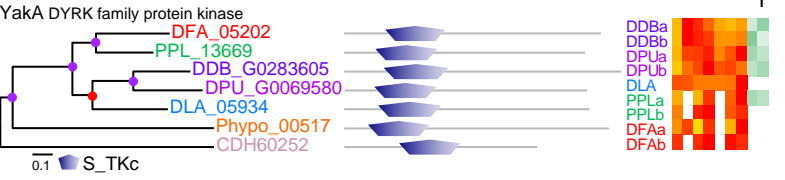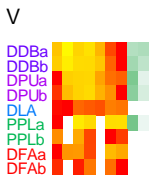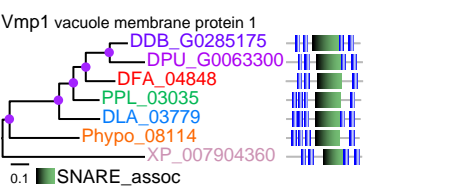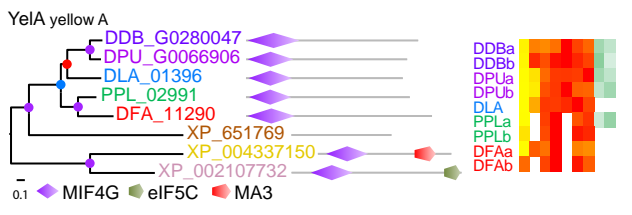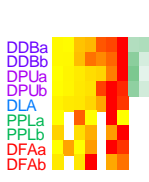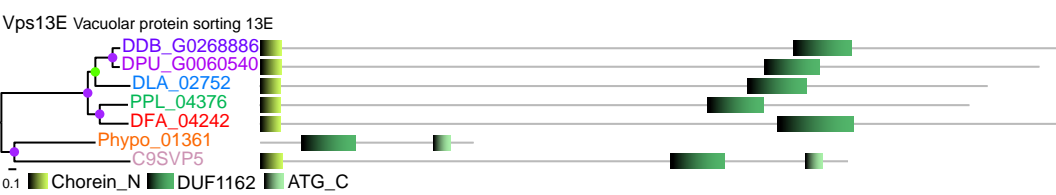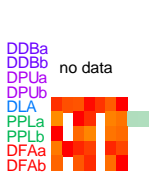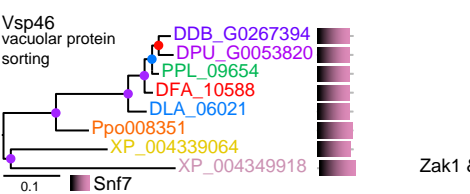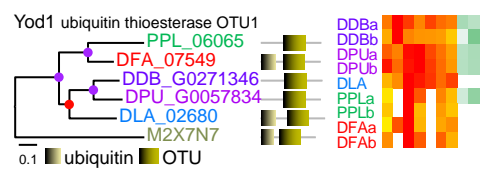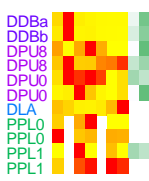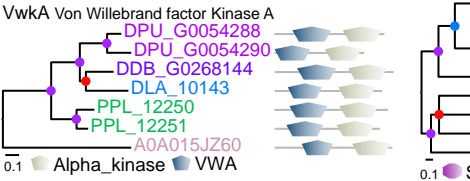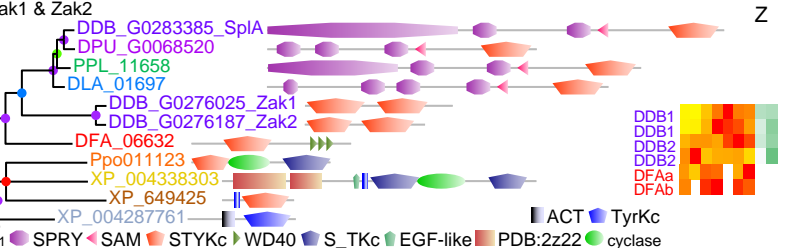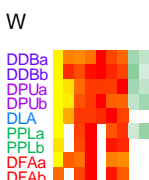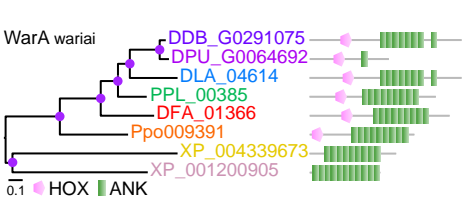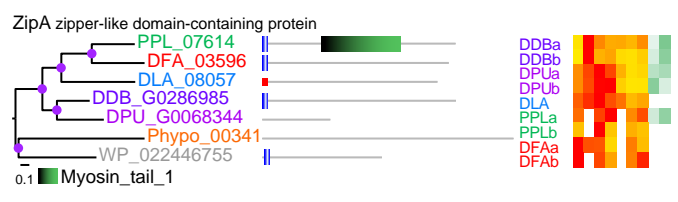

Supplement: ncomms12085-s3.pdf [file ncomms12085-s3.pdf]
